## A Microsatellite Linkage Map of the Porcine Genome

Gary A. Rohrer, Leeson J. Alexander, John W. Keele, Tim P. Smith and Craig W. Beattie

USDA, ARS, Roman L. Hruska U.S. Meat Animal Research Center (MARC), Clay Center, Nebraska 68933

Manuscript received August 23, 1993

Accepted for publication September 11, 1993

### ABSTRACT

We report the most extensive genetic linkage map for a livestock species produced to date. We have linked 376 microsatellite (MS) loci with seven restriction fragment length polymorphic loci in a backcross reference population. The 383 markers were placed into 24 linkage groups which span 1997 cM. Seven additional MS did not fall into a linkage group. Linkage groups are assigned to 13 autosomes and the X chromosome (haploid  $n = 19$ ). This map provides the basis for genetic analysis of quantitative inheritance of phenotypic and physiologic traits in swine.

**S**PECIES-SPECIFIC, high-density linkage maps comprised of highly polymorphic markers are essential to conduct comprehensive searches for loci that affect phenotype(s) of interest (FRIES 1993). The discovery of microsatellites (MS), abundant, multiallelic, codominant markers uniformly distributed throughout the genome (LITT and LUTY 1989; WEBER and MAY 1989; WINTERO, FREDHOLM and THOMSEN 1992), provided the technology required to rapidly produce linkage maps useful in identifying segregating loci of interest (LUONGO *et al.* 1993). Since MS are typed by amplifying DNA via the polymerase chain reaction (PCR) and then electrophoresed to separate fragments based on length, the procedure is easily automated (DIETRICH *et al.* 1992). Microsatellites, as sequence tagged sites (STS), are easily distributed anywhere in the world by publishing or submitting sequences of primers to public access databases further facilitating map construction.

One focus of genetic efforts to maintain dietary meat as a major protein source centers on identifying markers segregating with rapid lean growth, improved reproductive performance and disease resistance using a marker-assisted selection strategy. Unfortunately, current maps of major livestock species are cytogenetic in nature with few MS assignments (FRIES, EGGEN and WOMACK 1993). This has limited identification of loci associated with phenotypic or quantitative traits (GEORGES *et al.* 1993a, 1993b). Comparative genome mapping (WOMACK 1987; FRIES 1993) has assigned genes (type I markers) selected from human:mouse maps (O'BRIEN *et al.* 1993) using somatic cell hybrid panels (WOMACK and MOLL 1986) or *in situ* hybridization (CHOWDHARY *et al.* 1989). Linkage groups anchored by restriction fragment length polymorphisms (RFLPs) within type I markers are few (FRIES, EGGEN and WOMACK 1993) as they are often uninformative or only slightly polymorphic

within or between livestock breeds (FRIES 1993). In cattle, only 27% of the mapped type I loci have reported polymorphisms compared with 87% of anonymous type II markers (FRIES, EGGEN and WOMACK 1993). FRIES, EGGEN and WOMACK (1993) tabulated ~350 loci organized into 32 linkage groups that span 13 chromosomes and 26 syntenic groups in cattle (haploid  $n = 30$ ). Type I markers have now been assigned to 20 of 26 sheep autosomes (haploid  $n = 27$ ) (ANSARI, PEARCE and MAHER 1993).

An accurate assessment of total cM covered in the swine genome is difficult when only ~120 markers have been placed in 25 linkage groups (12 chromosomally assigned) (ANDERSSON *et al.* 1993). Only 38 of 73 MS loci published to date are linked (ANDERSSON *et al.* 1993). The most extensive individual reports are by FREDHOLM *et al.* (1993), who linked 14 markers into six linkage groups (67 total cM) and ELLEGREN *et al.* (1993), who placed 59 (total) markers in 13 linkage groups covering ~288 cM. The problem is compounded by a lack of markers on 5 of 18 autosomes (ANDERSSON *et al.* 1993).

In spite of the paucity of markers, swine represent a livestock species of choice for mapping quantitative trait loci (QTLs). Global production of pork as a dietary alternative to beef is at an all-time high (FOWLER 1992). The amount of muscle relative to fat is a heritable trait (WARWICK and LEGATES 1979). For mapping purposes, generation interval is relatively short and progeny number high. As omnivores, with a cardiovascular and gastrointestinal physiology similar to humans, swine also make excellent models for human disease (HODSON 1985). Genetic lines for such diverse human diseases as obesity (MERSMANN, POND and YEN 1982) and cancer (TISSOT, BEATTIE and AMOSS 1987) are readily available for mapping purposes.

Our results based on 383 informative DNA markers

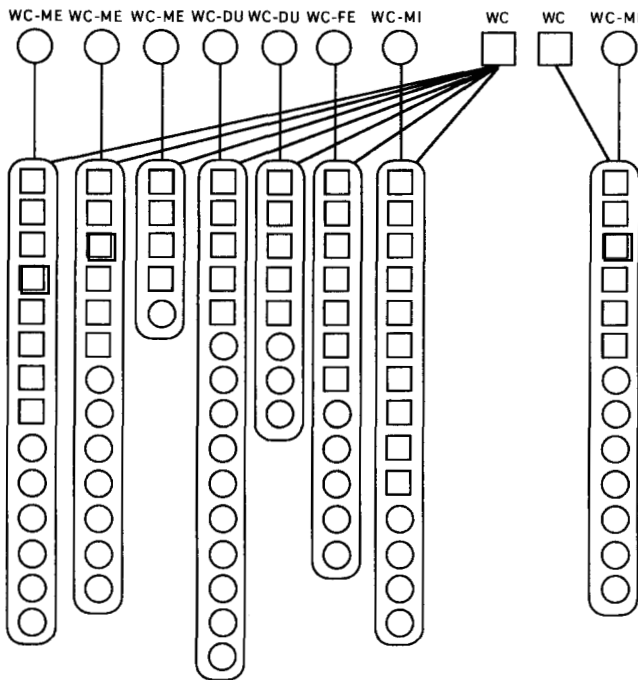

FIGURE 1.—Backcross family of two WC (1/4 Chester White, 1/4 Large White, 1/4 Landrace and 1/4 Yorkshire) boars mated to eight F<sub>1</sub> sows. DU, Duroc; FE, Fengjing; ME, Meishan; MI, Minzhu.

assigned to 13 autosomal and the X chromosome and 9 unassigned linkage groups spanning 1997 cM represents the first linkage map in swine sufficient to initiate a genetic analysis for any heritable trait. It represents our first step to create a high-density linkage map and initiate a systematic search for loci affecting phenotypes of interest (FRIES 1993).

## MATERIALS AND METHODS

**Generation of GT:CA dinucleotide microsatellites:** Procedures were performed essentially as described in SAMBROOK, FRITSCH and MANIATIS (1989). Porcine genomic DNA (20 µg) was digested with *Mbo*I restriction enzyme, the products were fractionated on a 1% agarose gel and the gel section corresponding to 200- to 500-bp excised. Size fractionated DNA (80 ng) was ligated into 500 ng of *Bam*HI-digested, dephosphorylated M13 mp18 RF DNA in a 100 µl reaction at 4° overnight. The ligation mixture was transformed into competent *Escherichia coli* (XL1-Blue, Stratagene, La Jolla, Calif.) cells and the resulting library (100,000 plaques approx.) plated at 2,000 plaques per 150-mm agar plate. Plaques were transferred onto nylon membranes and sequences were screened with 5'-[<sup>32</sup>P]-labeled (GT)<sub>11</sub> and (CA)<sub>11</sub> oligonucleotides (T4 polynucleotide kinase; [<sup>32</sup>P]-ATP 5,000 Ci/mmol). Filters were then washed with 2×SSC (0.3 M NaCl, 0.03 M Na<sub>3</sub> citrate), 0.1% SDS at 65° for 30 min, positive plaques purified and rescreened with the labeled (GT)<sub>11</sub> and (CA)<sub>11</sub> oligonucleotides. Positive phage were grown, single stranded DNA (ssDNA) extracted and sequenced (SANGER, NICKLEN and COULSON 1977) using Sequenase (USB, Cleveland, Ohio). The program PRIMER (Version 0.5; M. J. DALY, S. E. LINCOLN and E. S. LANDER, unpublished data) was used to design primer pairs for PCR based genotyping. Although where possible primers were only made from unique sequences of these clones, 14% of

MS used in this study contained a short porcine repetitive element (SINGER, PARENT and EHRlich 1987) adjacent to the dinucleotide repeat. Primer pairs with one oligonucleotide designed from nonrepetitive sequence and the other oligonucleotide possessing a high level of similarity to the repetitive element are denoted as *Swr* and loci not associated with the repetitive element are designated *Sw*. Approximately 200–300 primer pairs were obtained from each ligation reaction. Oligonucleotide pairs for 14 loci were identified by scanning porcine sequences in GENBANK and EMBL databases (GCG Corp., Madison, WI). Only those MS containing at least eight simple sequence repeats were selected.

**Data collection and analysis:** The genetic linkage map was constructed by genotyping 104 animals from two generations of a divergent, intraspecific backcross between the commercial meat producing White Composite swine (1/4 Chester White, 1/4 Large White, 1/4 Landrace and 1/4 Yorkshire:WC) and Duroc (DU; a North American breed) or the phenotypically different Chinese breeds: Fengjing (FE), Meishan (ME) and Minzhu (MI) (Figure 1). Microsatellites were genotyped by adapting previously reported procedures (JOHANSSON, ELLEGREN and ANDERSSON 1992) to 10-µl reactions. A total of 12.5 ng of genomic DNA, 5 pmol of each primer and 0.45 units of Taq DNA polymerase were used in each reaction. Concentration of dNTP was reduced to 30 µM each and a few markers required MgCl<sub>2</sub> concentrations greater than 1.5 mM. Samples were heated to 92° for 2 min, 30 cycles of: 30 sec at 94°, 30 sec at annealing temperature and 30 sec at 72° followed with a 5 min extension at 72°. PCR products were radioisotopically labeled, by either end-labeling a primer or by incorporating <sup>32</sup>P, and electrophoresed between 2 and 5 hr (based on product size) at 40 V/cm on 7% acrylamide gels. When radioisotope was incorporated directly the concentration of dATP was reduced to 15 µM and 0.1 µCi of [<sup>32</sup>P]dATP was included into the reaction. Allele size was approximated by comparison to M13 mp18 ssDNA sequencing reactions.

Direct incorporation of <sup>32</sup>P into amplified products increased sub-banding but was more economical to produce than end-labeled PCR products. End-labeled primers were used when sub-banding hindered accurate scoring, *e.g.*, *Swr* markers. This strategy permitted genotyping MS which otherwise could not be scored. Multiplexing two, three and occasionally four sets of primers enhanced data acquisition, improved scoring accuracy and reduced costs.

For those markers in which one parent and some of its offspring had an allele that would not amplify (null allele), the situation was rectified by reducing the specificity of primer annealing or markers that retained a null allele were coded as such (fragment size of 0 in Table 1). Animals whose genotypes were ambiguous (*e.g.*, homozygous 129/129 vs heterozygous 129/0) were not scored.

Traditional RFLP were produced by standard Southern blotting of 10 µg of digested genomic DNA and hybridization (SAMBROOK, FRITSCH and MANIATIS 1989) with a radiolabeled probe. Genetic variability at the major histocompatibility complex was mapped with RFLPs for the class I locus *PD6* (EHRlich *et al.* 1987) and class II loci *DQα* (*DQA*) (HIRSCH *et al.* 1990) and *DRβ* (*DRB*) (PRATT *et al.* 1990) developed in our laboratory (T. P. SMITH and C. W. BEATTIE, unpublished data). Two other loci were investigated with polymorphisms found with *Bgl*II for *kappa-casein* (*CASK*) (LEVINE *et al.* 1992) (R. STONE, unpublished results) and reported for *glucose phosphate isomerase* (*GPI*) (DAVIES *et al.* 1992a). Two RFLP were assayed by digesting PCR-amplified products. *Growth hormone* (*GH*) was amplified as described (KIRKPATRICK 1992a) and analyzed by three re-

TABLE 1

Microsatellite marker names, primer oligonucleotide sequences and PCR conditions

| Marker name <sup>a</sup> | Forward primer            | Reverse primer            | PCR temp. <sup>b</sup> | Frag. Size <sup>c</sup> |     |    | Alleles <sup>d</sup> |
|--------------------------|---------------------------|---------------------------|------------------------|-------------------------|-----|----|----------------------|
|                          |                           |                           |                        | Max                     | Min |    |                      |
| PGHAS                    | GTCACAGTGGATGGCATTTC      | ACATCCCCTAAGGTGCTGGC      | 65                     | 366                     | 322 | 12 |                      |
| ATP2                     | GCTGCATAGGAGCTGTAGG       | TAATGATGGTGGTGGTGTAGTC    | 62                     | 252                     | 246 | 4  |                      |
| DAGK                     | CTATTTCCCATGAACCCATG      | TCCCAGTGGGAAAAAAAAGT      | 58 <sup>3.0</sup>      | 132                     | 110 | 5  |                      |
| IFNG                     | ATTAGACCCTAGCCTGGGA       | GTTGGTCCCTGTTCTCCAATAGG   | 62                     | 243                     | 0   | 6  |                      |
| GRC                      | GGGCAGCTAAGGTGAGGAG       | TGAAGGCCACCACGGGTACAG     | 55 <sup>3.0</sup>      | 331                     | 270 | 4  |                      |
| IGF1                     | GCTTGGATGCACCATGTTG       | CACCTTGAGGGC AAATGATT     | 58                     | 237                     | 223 | 7  |                      |
| OPN                      | CCAATCCTATTCACGAAAAAGC    | CAACCCACTTGCTCCCAC        | 58                     | 164                     | 142 | 7  |                      |
| TNFB                     | CTGGTCAGCCACCAAGATTT      | GGAAATGAGAAGTGTGGAGACC    | 60 <sup>3.0</sup>      | 213                     | 174 | 7  |                      |
| CH13                     | TTGGCATCCTTGTTGAAAACC     | TTCATATGCTGCAGGTGTGGC     | 62                     | 137                     | 125 | 7  |                      |
| S0001                    | TGGATGGTCTCATTCTCAG       | TGATTCCTAGCCTGAGAAGC      | 50                     | 189                     | 175 | 6  |                      |
| S0002                    | GAAGCCCAAAGAGACAACCTGC    | GTTCTTTACCCACTGAGCCA      | 62                     | 209                     | 189 | 5  |                      |
| S0003                    | GAAGTGTTAAGGAAGCCCTT      | AGCCTCAGTTTCTCTACCTA      | 60                     | 162                     | 131 | 6  |                      |
| S0004                    | GATTATGGACAGGAAGGAT       | GTCTTATTTCTGCACAGTC       | 55                     | 172                     | 164 | 4  |                      |
| S0005                    | TCCTTCCTCCTGGTAACTA       | GCACTTCCTGATTCTGGCTA      | 60                     | 241                     | 203 | 8  |                      |
| S0007                    | TTACTTCTGGATCATGTC        | GTCCTCCTCATAATTTCTG       | 55                     | 197                     | 155 | 11 |                      |
| S0008                    | GAGGCAGTGTGTTCTATTTCA     | GGCATGTGTAAAGTGTGGCT      | 58                     | 191                     | 177 | 6  |                      |
| S0009                    | AAACATACCAAGAAGCCGAG      | TAATCTTTGCCATCCCTTGT      | 62                     | 132                     | 122 | 5  |                      |
| S0010                    | TTAACATGGCTGTCTGCACC      | GTCCTGTCCAACCTAAGA        | 60                     | 124                     | 102 | 9  |                      |
| S0061                    | AAGCAGAAGGGATCTCTCTA      | GCTGTTTTCTGGGTTCTCTTA     | 55                     | 187                     | 167 | 6  |                      |
| S0062                    | AAGATCATTTAGTCAAGGTACAG   | TCTGATGGGAACATAGGATAAAT   | 55                     | 196                     | 146 | 7  |                      |
| S0063                    | ACCCCTAGCCTGAAAATTC       | GGCAGTGGCAGGAGTTTATC      | 66                     | 221                     | 186 | 9  |                      |
| S0064                    | TGAGCTGGAGTTAGCTACC       | TGTCAGAAAGACTGCTTGGC      | 58                     | 160                     | 93  | 10 |                      |
| S0066                    | ACATTTAAGGTGAAGCAGCAAGTG  | TGTCATCAACATTGAGAATTGGTG  | 62                     | 158                     | 136 | 4  |                      |
| S0067                    | GGGAGCCACAACAAAGAAGG      | GGCCTGGAGTGTGGGACTAG      | 65                     | 113                     | 0   | 7  |                      |
| S0068                    | AGTGGTCTCTCCCTCTTGCT      | GCTTCAACCTTTGAGCAAGAAC    | 62                     | 260                     | 211 | 10 |                      |
| S0069                    | TGCAAACTAATGTTTTGTTGGC    | CATATGCCACAGGTGTGACCTAAA  | 62                     | 171                     | 0   | 9  |                      |
| S0070                    | GGCGAGCATTTTATTCACAG      | GAGCAAAACAGCATCGTGAGC     | 62                     | 293                     | 0   | 8  |                      |
| S0073                    | ACTGAAACAGGAATTCAGATCC    | TGAAGTATTATGCCATCATGGA    | 55                     | 123                     | 105 | 9  |                      |
| S0071                    | GACATGGAATCAGGTTGCTCAA    | CCAGAAGCAGGTTTGAGATGA     | 65                     | 200                     | 168 | 7  |                      |
| S0081                    | AACAGAATACAAAGCATAGTATAC  | CCTCTTACTCTTAATTTCTTGAC   | 60                     | 184                     | 172 | 5  |                      |
| S0082                    | CAGAAAAATAACTTGTCTAACTTG  | AACCCGTTTTCATATCATTAAAGCC | 58                     | 180                     | 154 | 6  |                      |
| S0083                    | AGCTGCCGTATATGAAAACCTCCA  | CTGCAACAGAGATGAGGAAA      | 58                     | 194                     | 0   | 8  |                      |
| S0084                    | AACTCAGCCACTTGCTGGGCTGTA  | TTCCATTTCAAGATGTATTCAAAG  | 56                     | 120                     | 102 | 9  |                      |
| S0086                    | GCACAGTCTATTGATACTGGCGTC  | CTGAGAACTTCCATATGCTCCTGG  | 62                     | 184                     | 154 | 5  |                      |
| S0087                    | GACAAGCTCCAGGAAGCTTTCCTG  | ATTGCCTTGTGATCCCAAGGGGCA  | 58                     | 201                     | 161 | 8  |                      |
| S0088                    | AGTGCATTTTGAAAGCAGTGCTC   | AGTCACCTCTAGGCGTATCAGCT   | 58                     | 164                     | 148 | 5  |                      |
| S0089                    | CATGTACTTGTAAATAGGTAAGTA  | CTGTAGTCTGCTGGTCTCTGAGA   | 55                     | 164                     | 142 | 9  |                      |
| S0090                    | CCAAGACTGCCTTGTAGGTGAATA  | GCTATCAAGTATTGTACCATTAGG  | 58                     | 253                     | 243 | 6  |                      |
| S0091                    | TCTACTCCAGGAGATAAGCCAGAT  | CAGTGACTCCATGCACAGTTATGA  | 55                     | 168                     | 148 | 8  |                      |
| S0092                    | GGGAAACACTAAATCACACTGCCAT | GGGATCAAGACTTCCACTCCCAT   | 60                     | 150                     | 130 | 7  |                      |
| S0094                    | AGTTCTCAGGGAGTTCCTCATGC   | CGAGCTCGCCTATCTATCAATTCC  | 62                     | 211                     | 169 | 7  |                      |
| S0097                    | GACCTATCTAATGTCTATATAGT   | TTCTCCTTAGAGTTGACAAACTT   | 58                     | 244                     | 208 | 8  |                      |
| S0099                    | CTGCCAGAGAGGCTTCTCTCAA    | CATCCGCCTGGTTCCTCCCTAT    | 68                     | 177                     | 159 | 6  |                      |
| S0100                    | CCTCTAGGAAGCTGTGTA        | AGCCATGACAGGAACGCCAGTAG   | 55                     | 179                     | 165 | 5  |                      |
| Sw2                      | TGCCAATGGTGTGGCTATAA      | CCCTGAAGGCTCAGATGGT       | 55 <sup>2.25</sup>     | 126                     | 88  | 9  |                      |
| Sw5                      | TTCAAGTTCATCCTTGTGTC      | AGTGTCCACAGATGGATGAATG    | 58                     | 142                     | 0   | 7  |                      |
| Sw7                      | TAACCATGCTTTTCTAGGTGG     | CCAGAGCTGAGTAAAAAGGTCA    | 65                     | 112                     | 89  | 7  |                      |
| Sw11                     | CTTTTTTGTCTAACCCAGTAACC   | AACACATGAGCATCGAGGTG      | 62                     | 102                     | 98  | 2  |                      |
| Sw13                     | TCTTAGCCAGTGCAGGCAC       | GATCAATCTCTAAACTGAAGGTG   | 58                     | 161                     | 145 | 8  |                      |
| Sw14                     | TTCTGCACCAAAGTTATTTTG     | AAAAGCAAAAACAAAACAAACC    | 58                     | 179                     | 153 | 7  |                      |
| Sw15                     | GGTGGCGCCTAAAAGTAC        | CTCAAATCTTGCCAAACTATCCC   | 62                     | 162                     | 150 | 4  |                      |
| Sw16                     | CATACACCCAGATGTGGC        | CTGTGGGAGTGTAGCATCTTTG    | 60                     | 172                     | 119 | 7  |                      |
| Sw17                     | GTTTAAAGCCACTGGTGTATGG    | ATCCTGACTTGCTTATGGCTG     | 58                     | 155                     | 143 | 4  |                      |
| Sw24                     | CTTTGGGTGGAGTGTGTC        | ATCCAAAATGCTGCAAGCC       | 58                     | 112                     | 92  | 6  |                      |
| Sw29                     | AGGGTGGCTAAAAAAGAAAAGG    | ATCAAATCCTTACCTCTGCAGC    | 61                     | 173                     | 131 | 9  |                      |
| Sw35                     | TCAACTTGGAGAGTCTGAGGC     | AAGACTGCCACCAATGAG        | 58                     | 137                     | 129 | 5  |                      |
| Sw37                     | CTTTGTAGACGGTGGTCCT       | GAAGCCACCCACAAATCA        | 60                     | 226                     | 212 | 4  |                      |
| Sw38                     | ACGCTCTGTGCTGGTCCCT       | GAGGCTCCTGATAGCAGCC       | 60                     | 139                     | 128 | 8  |                      |
| Sw45                     | TATGACCTGGTGGTATGTTGG     | TGTTTTCTCCCTCAGATTACC     | 58                     | 194                     | 174 | 7  |                      |
| Sw54                     | TCCACCTTTTCTGCTCC         | TCACAGCAACAGAGCTGTGG      | 63                     | 124                     | 112 | 3  |                      |
| Sw57                     | GGTTCCCTAACCTGGCTGTGC     | ATATGCCTTGGGTGCAGC        | 62                     | 103                     | 97  | 3  |                      |
| Sw58                     | TCCTACCAGAAATCCTACCACA    | ATGGGAAGAGAATCTGACAAGG    | 58                     | 222                     | 204 | 7  |                      |
| Sw60                     | TCCGTATGCTGTGGATGTATC     | CATGTGCTGCAAATGGC         | 58                     | 152                     | 116 | 8  |                      |
| Sw61                     | GAGAGGGATGAGCACTTGG       | AGAGATTTCCAGGCTTCTA       | 62                     | 262                     | 238 | 8  |                      |
| Sw63                     | GAGAAAGGCAACCGCTG         | GTTGGTGTGGTGTAGGCC        | 62 <sup>3.0</sup>      | 160                     | 148 | 5  |                      |
| Sw64                     | AGACCAAGGGCCATGAGAG       | TTCCACGTGATGTGGGATAG      | 58                     | 152                     | 136 | 6  |                      |
| Sw65                     | AAGAAATGTGACACCATCCAGC    | GCTGTAGTCTGTGATTTGACCCC   | 65                     | 285                     | 251 | 4  |                      |
| Sw66                     | AAACCGAGAAAGGTGGGTG       | GATCTTGAAGTGCCTCCG        | 62                     | 127                     | 91  | 8  |                      |
| Sw67                     | GTCCTCATGGAGACTGTTGGG     | TCCATGCCATGGACACAG        | 60                     | 147                     | 125 | 6  |                      |
| Sw68                     | TTGACCCTAGCTGGGAAC        | TTTTCTGGGCTTAGTGGC        | 63                     | 253                     | 249 | 3  |                      |
| Sw69                     | TCAGCTTCGTGAACAAGGG       | ACCTCCCTCATCAGCTATTCC     | 55                     | 166                     | 146 | 5  |                      |
| Sw70                     | CCCGTACAGTCAACCCAC        | CTTTTTCTGGGTTGAGCAAC      | 62                     | 148                     | 120 | 7  |                      |
| Sw71                     | GATCACCTTATCCCAATTC       | TAGAAACACCATCATCCATTCA    | 62                     | 111                     | 93  | 5  |                      |
| Sw72                     | ATCAGAACAGTGGCCGT         | TTTAAAAATGGGGTGTTC        | 58                     | 113                     | 101 | 5  |                      |
| Sw77                     | ATCAGACCCAGGGTTGCC        | GAAATCTGCATGGTCTCAGATG    | 62                     | 146                     | 119 | 6  |                      |
| Sw80                     | TGACAGCAACGTGACCAG        | TGGATTGGAATAAGCAATGAGG    | 62                     | 176                     | 160 | 8  |                      |
| Sw81                     | GATCTGGTCTCGACAGGG        | GGGGCTCTCAGGAAGGAG        | 60                     | 142                     | 0   | 9  |                      |
| Sw84                     | TTCACTATTCAGAGCCACTCTG    | ATCTGACATTGCTGTGGCTG      | 58                     | 178                     | 162 | 7  |                      |

TABLE 1

Continued

| Marker name <sup>a</sup> | Forward primer             | Reverse primer           | PCR temp. <sup>b</sup> | Frag. Size <sup>c</sup> |     |                      |
|--------------------------|----------------------------|--------------------------|------------------------|-------------------------|-----|----------------------|
|                          |                            |                          |                        | Max                     | Min | Alleles <sup>d</sup> |
| Sw102                    | GATCAAGATGTACACAGGCATG     | AACCTTCTATCTTCTCATGCCG   | 58                     | 106                     | 96  | 4                    |
| Sw104                    | TTTGCCGGACTTATTTCAACC      | ATCTGCACCCCATATTTCACTG   | 60                     | 237                     | 219 | 4                    |
| Sw120                    | TTTTAAGATGTGGCTGTGTGG      | GATCACCTGCTAAGTGAAAGTCA  | 60                     | 150                     | 134 | 6                    |
| Sw122                    | TTGTCTTTTATTTTGGCTTTTGG    | CAAAAAAGGCAAAAGATTGACA   | 58                     | 132                     | 110 | 10                   |
| Sw129                    | TTGTTTAAAGTTTTGGGTTGC      | TTGCATGAACTTTTCAACACTG   | 58                     | 129                     | 107 | 7                    |
| Sw133                    | GGCCTGAATTACATATGTTCCC     | AATGTGGCAACAAAACAAAAG    | 60                     | 150                     | 142 | 5                    |
| Swr136                   | TTCTTGCCGTCACTCATG         | CTGGGACCCTCCATATGATG     | 58                     | 227                     | 191 | 8                    |
| Sw137                    | CAGCAAAGTGACCCAGCC         | TCCTGCTGTGAAGCACAGAG     | 60                     | 135                     | 0   | 6                    |
| Sw139                    | CGACACCCTTGGGTTTTG         | ATCTAAAAATGGGCCTTTGGG    | 60                     | 128                     | 120 | 5                    |
| Sw142                    | AGTTTGCAGCATTCGATTCC       | ATTTGTTGCCATTCATGATCC    | 58                     | 131                     | 115 | 5                    |
| Sw147                    | TTGCCCTTCTCCATGTGACT       | ACAACCTAACCATTTGTACAGG   | 58                     | 220                     | 208 | 6                    |
| Sw149                    | TCATGTTTACAGAACACCTTCC     | AGTTACGGTGGGTCGTAATCC    | 58                     | 138                     | 108 | 4                    |
| Sw151                    | TTCCCTATGATGAGATGGC        | GGTGTGGCCCTCAAAAAGG      | 60                     | 207                     | 195 | 4                    |
| Sw152                    | GGATTTTAGGGCTGAATCTGC      | GATGACCTTGCAATGCC        | 62                     | 182                     | 166 | 5                    |
| Sw154                    | CAGAGGGCAGCAGAAATAC        | GATCCATGAACCTGCATGTG     | 60                     | 148                     | 0   | 6                    |
| Sw157                    | GCAATGTCCGATTCTTTTATTT     | ATTGCTGTGGCTGTTGTTGT     | 58                     | 168                     | 159 | 4                    |
| Swr158                   | TCCAATTCAACTCCCTGGCTC      | GAATGTGCACATACCCATGCG    | 58                     | 200                     | 158 | 8                    |
| Sw159                    | GATTGGGAATTTGGGGTTG        | GCATTGTTGTTTTTCATTTCGCG  | 58                     | 159                     | 131 | 5                    |
| Sw160                    | TCTTCTTGTCTACATGACCC       | ACTAGACAGCCAGGCTGGG      | 58                     | 132                     | 128 | 3                    |
| Sw163                    | GCTATCCCTGAGAAACAGTGT      | GATCCATAATGGGCTCAGCC     | 60                     | 184                     | 166 | 7                    |
| Sw168                    | GCACCTTTCTTCCCTTACCCC      | CAGTGTAAAGCATGGAAAGATGC  | 62                     | 116                     | 102 | 4                    |
| Sw171                    | CAGATTGTTTACGCTCTGTGTG     | CATCTTTTCCAATGACAACATG   | 60                     | 125                     | 101 | 4                    |
| Sw173                    | CTGGGAACCTCCATGTGC         | GTCTGGGCCTTTAGCTAGG      | 58                     | 216                     | 194 | 6                    |
| Sw174                    | GCCAAAATAGCTATTGGACAGC     | TCATGCTATTTGTTCCAGATG    | 58                     | 131                     | 123 | 5                    |
| Sw175                    | TCACACCTGTATAAGAGATGCA     | TGTTGGGCAAAAATCTGAATT    | 60                     | 126                     | 102 | 6                    |
| Sw184                    | CTCCCTGCATATATTTTCATCC     | ATCCCTAGCCCTGGAAATGTC    | 50 <sup>3.0</sup>      | 236                     | 222 | 5                    |
| Sw188                    | ACAAACATACATCCAGTCCATG     | GCTTCCCTACTGAATGCTTATG   | 58                     | 150                     | 128 | 5                    |
| Sw191                    | ATGATGGGAACCTCCCTGGCTC     | AATTTCAATGTCCACCATGG     | 58                     | 199                     | 153 | 5                    |
| Sw193                    | TGCCATCCTTTCTTTCATTACG     | TCACTCTGAGGGGTCCTGAC     | 62                     | 109                     | 101 | 4                    |
| Sw194                    | TGCCCTGCTTACATTAAGTGGG     | CCTCACTTAAGAAGGTTCTCTGC  | 58                     | 102                     | 98  | 2                    |
| Swr198                   | TTTCATCAGCAACTTTCAGAAG     | GGTCCGGCCCTAAAAAAAAG     | 60                     | 110                     | 72  | 6                    |
| Swr201                   | TGGAAACACTCTGGCATAACC      | CTCCAACCTCAGCCCTAGC      | 62                     | 143                     | 123 | 6                    |
| Sw205                    | CACAGGTCCATCACTCATG        | GGGTATCTAATGTACATCACGG   | 58                     | 156                     | 146 | 4                    |
| Sw206                    | TCAGTGTGTGAACCTGTGTGG      | TGGTATTGGAAATGAATCTTCA   | 55 <sup>3.0</sup>      | 153                     | 137 | 6                    |
| Sw207                    | CGCTTCACAAAATAAGTTGGG      | GTTGTTACTCCAAAAGGTGC     | 58                     | 188                     | 170 | 6                    |
| Sw208                    | AACAAAATATTTAAAAACTCTGTGTG | GCAAGAAATAATCAAACAATCT   | 60                     | 156                     | 132 | 6                    |
| Sw210                    | TCATCACCATCATACCAAGATG     | AATTTGCCAAGAAGAGAGGCC    | 60                     | 242                     | 218 | 8                    |
| Sw211                    | TCATCAAGAAAATTGGCTTGG      | TGACCACAAGGAAGAACTGG     | 60                     | 152                     | 140 | 5                    |
| Sw216                    | ATCTGGGATAATTTGGACATCC     | CCCTAATCCCAGGCTCTTTC     | 62                     | 140                     | 120 | 5                    |
| Sw225                    | AGGACCCACCAAGAGTTACC       | TGCTGGTAATGGGTATTAGG     | 55                     | 116                     | 94  | 7                    |
| Sw236                    | AATGAACACTTTTATGGGGCC      | GACATCTCACTGGCTGAAAGC    | 65                     | 147                     | 123 | 7                    |
| Sw240                    | AGAAATTAGTGCCTCAAAATGG     | AAACCAATTAAGTCCCTAGCAAA  | 58                     | 114                     | 94  | 8                    |
| Sw245                    | TGGTGTAGCAGAACCTGTG        | AAACCTGGCAACACAGCAG      | 60                     | 130                     | 106 | 9                    |
| Sw248                    | CCATCCACGTTTTTATAAATGG     | CAACCTAAGTGTCCATCAATGG   | 58                     | 142                     | 114 | 5                    |
| Sw249                    | GAAAGCAGGACTTGTCTCTG       | ATCATCACTCTCCCAACATGG    | 58                     | 156                     | 0   | 8                    |
| Swr250                   | CACTCAATGTCTCGAATCAAGC     | CTGGGGCTGTGGTGTAGG       | 65                     | 176                     | 166 | 6                    |
| Sw251                    | CCCAATATTCATAGCAGCATTTG    | TGAGTAATAGCCCATTTTGGG    | 58                     | 136                     | 130 | 2                    |
| Sw252                    | CTCTGGGTCATCCATTTTG        | CTTGATGCAAAAACATGGAAAGC  | 62                     | 179                     | 149 | 7                    |
| Sw255                    | TGTACAGCTCTAGTTTGACCCC     | TCTGCTTAGTGGCAAACTT      | 58                     | 126                     | 122 | 2                    |
| Sw256                    | ACAAAAGCTTTTGGAGAACTCG     | TAGCATAGGAACAGGTGCAGC    | 62                     | 118                     | 92  | 7                    |
| Sw259                    | CCTTTCATGCTGTATTTAACCC     | CAGAGAACAGAAGTTGGGG      | 55                     | 180                     | 0   | 6                    |
| Sw262                    | TACTTGGCTTTTGTGACCAG       | TCAGCCAAAAGGGCTCTTG      | 62                     | 204                     | 200 | 3                    |
| Sw263                    | TCAGAAAATCTCTTTGCCCA       | GATCTTAGCTTCAAAAACAGCA   | 58                     | 149                     | 133 | 6                    |
| Sw268                    | CTGATTCACCTTTCATTCGAGAA    | AGCCCTTCCCTTAATATAACCC   | 60                     | 149                     | 121 | 7                    |
| Sw270                    | TTCCCTTACTGCTCCCCC         | GAAAGGAGGGAGAGCTGCTC     | 60 <sup>3.0</sup>      | 163                     | 139 | 8                    |
| Sw271                    | TTCCAGTGGCTTTCTGTGC        | CATTCAATCCCAGTGAACCTTG   | 58                     | 134                     | 108 | 7                    |
| Sw274                    | CGCAGACGGACATCTTTTTTA      | AAAGTCAGCCCTAAAAAGACA    | 60                     | 145                     | 107 | 5                    |
| Sw280                    | CTAGTTGTATCCATGCTGCTGC     | TCCATATGCTGCACACAG       | 58                     | 231                     | 0   | 10                   |
| Swr283                   | TGGGACTTAATTGTGATTCTGTG    | GATTTGACCCTAGCCTCG       | 60                     | 158                     | 154 | 3                    |
| Sw286                    | GGTGACAGAAATACAGTTTCCC     | GATCTTCTTATTTGGCCGTGTG   | 62                     | 94                      | 74  | 6                    |
| Sw287                    | TTGAAAGTCTACCCATGTGTGG     | CATCCCAATGTCACTGC        | 60                     | 175                     | 160 | 6                    |
| Sw288                    | AAAATAAAAAGCATGGCCTGC      | GGGAAAAACATGTAATTGCC     | 60                     | 133                     | 103 | 5                    |
| Sw295                    | ACCTGCCAGATTGTGGC          | AAGAGTTTCATTTCTCCCATCC   | 62                     | 139                     | 109 | 8                    |
| Sw301                    | AACCAAGCCACTTTCCAC         | GCTGAAATGCCATCTGCG       | 62                     | 156                     | 124 | 7                    |
| Sw304                    | GATCCCTGACCTGAGAATCC       | CACTGCACAGAATTTGTGGC     | 58                     | 146                     | 130 | 5                    |
| Sw305                    | AGCTTTCATTTTTTTAAACCCATC   | TCACCTTTCACACCCATCACC    | 58                     | 108                     | 106 | 2                    |
| Sw307                    | CTTCCACATGTCATGGATGTG      | ACCTGCTTTCATGTTTACATGG   | 58                     | 135                     | 119 | 4                    |
| Swr308                   | TCCAGTCCCTTGGTCTCTTG       | TTAGCTTGGGAACCTTCCATG    | 65                     | 160                     | 119 | 8                    |
| Sw310                    | CAGAAGGATGAATATGCAAAATG    | GTCTTTCAGGCTTGGAGGG      | 62                     | 135                     | 109 | 6                    |
| Swr312                   | ATCCGTGCGTGTGTGCAT         | CTGGTGGCTACAGTTCCGAT     | 60                     | 141                     | 127 | 7                    |
| Sw314                    | CCTCCTTGAGCCTACCTTTC       | CCCTAGCCCTGGAACTTCTG     | 62                     | 118                     | 102 | 6                    |
| Sw316                    | TTCTCCAGCCATCATGAGTG       | AATGACCATTCCCTGAGGCTG    | 58                     | 159                     | 133 | 8                    |
| Sw317                    | GGGATGCTAAAGTTGGAGGG       | TTAGTGTCTGGGCAAGGAG      | 62                     | 168                     | 154 | 5                    |
| Sw322                    | CATTCAACCTGGAATCTGGG       | TCCCTGGAAAGGCTACACC      | 62                     | 118                     | 102 | 6                    |
| Sw328                    | GATCCAACCTGCCATTCTATTG     | CAGGGTGGCGCTAGAAAG       | 62                     | 182                     | 0   | 5                    |
| Sw330                    | GTAAGTCCAGACTGTAATTTGGG    | TCTACCATGCTGATAAAAATGGCA | 60                     | 116                     | 100 | 4                    |
| Sw332                    | TTTTCAATATCACATTTCACTCATGC | TTTACAAAGTGGTAGATTAATTA  | 58                     | 115                     | 109 | 3                    |
| Swr334                   | CAAGTCAAAGACAGATACTCTGTGTG | TGTGGATAGTTTTCAGATGAGG   | 58                     | 222                     | 0   | 9                    |

TABLE 1

Continued

| Marker name <sup>a</sup> | Forward primer                 | Reverse primer          | PCR <sup>b</sup> temp. | Frag. Size <sup>c</sup> |     | Alleles <sup>d</sup> |
|--------------------------|--------------------------------|-------------------------|------------------------|-------------------------|-----|----------------------|
|                          |                                |                         |                        | Max                     | Min |                      |
| Sw335                    | GAGTATGGGAAAGCCACG             | CCATCAACAAACTGTATGCACC  | 58                     | 112                     | 100 | 4                    |
| Sw340                    | CATTGGTGATTGGCATCCC            | ATGGGCTGGCAGCTACAG      | 58                     | 149                     | 0   | 5                    |
| Sw342                    | GGGTTCTGTGGTAGTGACTGC          | TCATCCACAACAGCAGAACC    | 55                     | 127                     | 91  | 10                   |
| Sw344                    | AGCTTCGTGTGTGCAGGAG            | GTAGTGGTCCAAAGAGAGTGCC  | 55                     | 174                     | 150 | 6                    |
| Sw345                    | AACAGCTCCGATTCAACCC            | TACTGAGCCTTAAAAGGAAGGG  | 55                     | 166                     | 140 | 5                    |
| Sw349                    | CCTGTTGTAGGCTCCATGAG           | CTAGGAGTCGGCCCTGAAC     | 62                     | 177                     | 149 | 9                    |
| Sw352                    | GCCGCCATTCTCAATTAC             | GATCAAGCTCCCTCTTCCG     | 55                     | 111                     | 107 | 3                    |
| Sw353                    | CACCCCATGCCTGAATACTG           | ATGTGAAGACTCATGCTTGGG   | 58                     | 164                     | 144 | 8                    |
| Sw354                    | TGGCTTCTCAGCCTCCAC             | GGTTCCTCAAACAAACATAGCC  | 60                     | 222                     | 206 | 5                    |
| Sw373                    | TTTGCTGCAAAGCAATGTTC           | GGTAGGATTCATAACACCTGG   | 55                     | 170                     | 152 | 6                    |
| Sw374                    | AGTAATGCCATCCTCCCCAG           | TGCTCTCCAGCCCTCAAG      | 62                     | 169                     | 141 | 7                    |
| Sw378                    | ATTATGCACCCTACTCCCC            | GATTTCTTCTTTGTTTGTGCC   | 60                     | 127                     | 123 | 3                    |
| Sw382                    | CTGAGCCACAGAGAGCAGC            | GAGTGTGTGCAAAGGGGG      | 65                     | 144                     | 132 | 3                    |
| Sw389                    | TTTTTTAGTGTGCTGTTTTCCG         | GTAGGCCAGCAGCCACAG      | 62                     | 122                     | 120 | 2                    |
| Sw395                    | TTCCAAGGTTATGGAGATATCC         | GATCCCTACCTCACACCACA    | 55                     | 163                     | 139 | 9                    |
| Sw398                    | AAGTGCCAAATGCTTTGTTC           | CGGAGGAGAAATAAGGCTAGC   | 55                     | 188                     | 166 | 6                    |
| Sw403                    | GTGTATGTTTATGCTGGGTG           | GTCTCTGCTTTGCTTGATG     | 55 <sup>4,5</sup>      | 114                     | 102 | 5                    |
| Sw413                    | CAGACACACCCCAAGTGTG            | AGGTCCAACCCCTCATGATG    | 62                     | 174                     | 162 | 5                    |
| Sw419                    | AATGGGAAATAGGCTTAAGCC          | TCCCTCCCTATACATGTGC     | 55                     | 174                     | 154 | 6                    |
| Sw423                    | ACTCAGGTAATGGTAAACTATATGTGTG   | TTCTTCCACATTATTCCTTGTGG | 60                     | 149                     | 139 | 5                    |
| Sw426                    | CCTACATATGCCCGAGGTG            | GAGAAGTGGGGAAGGGACTC    | 62                     | 202                     | 184 | 9                    |
| Sw428                    | TTCCACGTAGATTTTTGACACG         | ACCTGCGTCCCTCATGGATAC   | 52                     | 123                     | 0   | 7                    |
| Sw435                    | ATCATGTGAGAAAAAGACATATGTG      | TGCAAGAGAAGCTCCGGC      | 60                     | 178                     | 148 | 6                    |
| Sw436                    | GGACTTCTAGCCTCCAGAAGCTG        | AATTTTCAATCACTACCACCGG  | 58                     | 162                     | 144 | 5                    |
| Sw439                    | TTCTAGCCTCCAGAAGTGAAG          | CTCTCCATCTCTCACCATA     | 58                     | 179                     | 161 | 5                    |
| Sw443                    | ACAAAGGCCAAGCCACATAC           | TCACCAGGTTTTCTGGGTTTC   | 60                     | 134                     | 108 | 7                    |
| Sw444                    | ATAGTTTCGGTTGGCCAG             | CTTAAAGCTCAAGGTAAACAGGC | 60                     | 120                     | 92  | 10                   |
| Sw445                    | CCTCCCTGGCACTCATTG             | CACACACACAAGCAGGTGC     | 58                     | 203                     | 181 | 11                   |
| Sw446                    | GGTTTCCTGTCTGTAATAAGGG         | ATCCCTGGCTGGGAAGCTC     | 60                     | 164                     | 118 | 10                   |
| Sw452                    | ACAGGAAAAGTAGCTGCC             | TGGAACATGATGGAGATAATG   | 60                     | 97                      | 87  | 5                    |
| Sw453                    | TTGAAATTTTTTCATGGAAGCC         | TCTGGAATGTCTGTACTGTG    | 51                     | 189                     | 173 | 4                    |
| Sw458                    | TTATGGTTTCTTGTCTGTG            | CCGTTTACTGCAGGTAACC     | 62                     | 123                     | 117 | 3                    |
| Sw460                    | ATTGCACACCTATCTCATATGG         | AATCTCCATGTGCCGAG       | 60                     | 199                     | 159 | 8                    |
| Sw467                    | TATACCTTTAGCCCTAGGAGC          | CTCAGCCGTTGGATAACTC     | 55                     | 130                     | 114 | 7                    |
| Sw468                    | GCTTTAAAAACCCTCTGCC            | TGATTTGACCTTAGCTGG      | 60                     | 166                     | 120 | 7                    |
| Sw472                    | AAAATGAACCCTCTCCAGTTTC         | TCTGAACACTACAGCCCGC     | 58                     | 111                     | 95  | 3                    |
| Sw480                    | TGCCGGAAGGTTCTGC               | CTTCTCTCTTGTGGCCCTG     | 60                     | 144                     | 72  | 6                    |
| Sw482                    | GGAGAAAAGAAATGATTAGCAA         | CCCAGATGCTGGTTTGT       | 58                     | 267                     | 257 | 4                    |
| Sw485                    | CCATTTCAATTCATGGAAGG           | CTAAGCCGCAACAGGAAGCTC   | 60                     | 119                     | 97  | 5                    |
| Sw486                    | GCAAACTTGTGGCCG                | TCCATTTGCTAATAAGAGCTGA  | 50                     | 160                     | 138 | 6                    |
| Sw487                    | TGAGCACCTCTGCTTGAGTC           | ACACCTCTAAAATGGCAGTGTG  | 58                     | 188                     | 148 | 9                    |
| Sw489                    | CAAGTGTGAAATTTGTGGG            | CGAAGTGCTAACTATAAGCAGCA | 55                     | 174                     | 156 | 6                    |
| Sw491                    | TTTAAAGCCACTGCACAGG            | CAGGGAACCTCTCATAGTCCC   | 60                     | 174                     | 154 | 3                    |
| Sw492                    | TCCATCAGCTCACATAGTTAGC         | ACCATGACAGGAAGCTCCGAG   | 60                     | 146                     | 118 | 7                    |
| Sw493                    | ATATTTAACCCATTTGCAGCATG        | CTCCAGCTCCACTTAGACCC    | 58                     | 194                     | 156 | 8                    |
| Sw497                    | TTAGGAAGCTCTGGGTTTGG           | TGGGAGTTCCATGTGTTG      | 58                     | 116                     | 94  | 9                    |
| Sw510                    | GTTCCATAAGCTCATCACTCA          | ATATTCTGCATTGCAGCCC     | 60                     | 160                     | 150 | 6                    |
| Sw511                    | AAGCAGGAATCCCTGCATC            | CCCAGCCACAGTCTGC        | 60                     | 205                     | 165 | 7                    |
| Sw512                    | TATAGTGCAGTTATATCTCAATACAAATGG | TCTGACATTAATACACCACCCC  | 58                     | 157                     | 129 | 7                    |
| Sw520                    | GCCACCGGTGTACTCTAAA            | CTTTTCCCAAGTCACTTAGCA   | 62                     | 124                     | 102 | 5                    |
| Sw527                    | AGCAAGAGCCAGGACATACC           | TAACTGTTGAGCCACAAAAG    | 62                     | 168                     | 128 | 5                    |
| Sw539                    | CCCATCCACGCTAAGAAGAG           | TCAACGGGAACAAGTGAAG     | 60                     | 150                     | 148 | 2                    |
| Sw540                    | TCAGTGGAGGGGGAATAAAC           | CCAAATCTGGCAACACAG      | 58                     | 253                     | 229 | 8                    |
| Sw552                    | AAGAGCCAGTGGGGAGG              | ACTGATAAGACATGTGTGTGC   | 60                     | 146                     | 112 | 7                    |
| Sw557                    | TGTCCACTGGTAGATGAATGG          | CTTTTGAATGTTCTTTTCCCC   | 55                     | 250                     | 240 | 3                    |
| Sw575                    | CTACAGCCGTTGGCTACAG            | AGGAATCCATTAGCCTGG      | 60                     | 157                     | 151 | 3                    |
| Sw581                    | CCCAGATTGACTCTAGACTCG          | CATGATGGAGGATAATGTGGG   | 57                     | 205                     | 199 | 3                    |
| Sw589                    | TTCAAATCTCACCACCAGTCC          | CTCATCAGCAGCAACCACC     | 60                     | 150                     | 138 | 6                    |
| Sw590                    | ATTTGCTGAGAGTAAAGTGCC          | GCATTGACCAGGGTCAGG      | 60                     | 271                     | 184 | 4                    |
| Sw605                    | AGCCTTCTGTGCAGAAAAGC           | CCCAGGTTCTCTGCTCTC      | 58 <sup>4,5</sup>      | 131                     | 109 | 5                    |
| Sw607                    | AGCACCTGGCAGGATAAAC            | GCAAGAACTGGTTTTCCAGC    | 58                     | 172                     | 152 | 3                    |
| Sw617                    | CTGGGTTACAGTGTCTGCC            | TGTGATGGAGCCTGATAGAGG   | 65                     | 157                     | 145 | 4                    |
| Sw619                    | CACTGGTAAGTATTCAGGGTGG         | TATGCTTGTCTGCATCATCG    | 58                     | 147                     | 129 | 7                    |
| Sw632                    | TGGGTTGAAAGATTTCCCAA           | GGACTCAGTACTTTGGCTTGA   | 58                     | 173                     | 157 | 6                    |
| Sw698                    | ATACAAACCATAGCCATGGACC         | GATCCGATTTCCAGCCTTAA    | 58                     | 224                     | 194 | 5                    |
| Sw702                    | CTGCTGTTTCTGTTTCACTGC          | TTGAGCTCCTGTTCAACC      | 65                     | 160                     | 152 | 4                    |
| Sw703                    | AAGATGAAGCAGGACATCAAGG         | CTTATGGCTTTACTGTTCCACC  | 58                     | 140                     | 126 | 7                    |
| Sw705                    | CTGAAGTCTTGAGATGAAACGC         | TGTAGAGCATTTCCAGAGGAAGC | 62                     | 163                     | 145 | 5                    |
| Sw707                    | ACGTGCTTTCTTTGAGCTG            | AAAAACGCTAAAGAACAAAGCG  | 58                     | 101                     | 0   | 5                    |
| Sw709                    | TCTCAAGGTCACACAGCAGG           | AAGGACAGTGGTAGGCATG     | 58                     | 143                     | 127 | 3                    |
| Sw714                    | ATCTCTTGTTAGAATTTGTGTGTG       | GAGATGAATATGGGAAAATGAAC | 58                     | 169                     | 145 | 4                    |
| Sw724                    | TCCTAAAGGACCGAATTTAAAA         | TGTGCATTAAATGCCAGGTATG  | 55                     | 166                     | 144 | 5                    |
| Sw726                    | CACCACAGAGGGAAGCTCCTC          | TCATATGCCACCGGTGTC      | 58                     | 155                     | 125 | 7                    |
| Sw727                    | ATCTCTCTGGTTTTGAGATTTAAGG      | GGCCTGGTTCCATTTAGGG     | 58                     | 148                     | 144 | 3                    |
| Sw730                    | ACCAAGTCCAGGCTAAATGC           | GTTACAGGCTGGGAGCAAAAG   | 60                     | 137                     | 131 | 4                    |
| Sw732                    | GCAAATGAATGACCAAAAAGG          | CATTTTCAATTTGGATTGTTTC  | 55                     | 180                     | 168 | 4                    |
| Sw741                    | TGCATTTCTGTGTTTTTTTTGA         | GTGCCTGTGGCGTAGACC      | 62                     | 144                     | 0   | 6                    |
| Sw742                    | AATTCTACTTCTGGGAGAGGG          | CTTTTGGGAACATTTCTGCC    | 60                     | 224                     | 193 | 9                    |
| Sw745                    | CTGAGTCTTCTGGGAAGTTTTCT        | ACAGGGCTGGTAGTGTCCC     | 58                     | 211                     | 137 | 7                    |
| Sw747                    | TGGCCAGGAAGTTTCAG              | ATCCCATATGCACCAGGC      | 58                     | 153                     | 149 | 3                    |

TABLE 1

Continued

| Marker name <sup>a</sup> | Forward primer           | Reverse primer                | PCR temp. <sup>b</sup> | Frag. Size <sup>c</sup> |     | Alleles <sup>d</sup> |
|--------------------------|--------------------------|-------------------------------|------------------------|-------------------------|-----|----------------------|
|                          |                          |                               |                        | Max                     | Min |                      |
| Sw748                    | CATACATACACCATGCCCATG    | TTTGCCACAGAAATGTTTAC          | 50                     | 193                     | 179 | 6                    |
| Sw749                    | TTCCCAAACCAACAAAGAG      | AGGAACCTGCCAAAATCACG          | 58                     | 113                     | 107 | 4                    |
| Sw750                    | CATGGACATTAATAAAGTGCTC   | GGAAGCTCCATGTGCTG             | 58                     | 147                     | 140 | 5                    |
| Sw752                    | TCAAGAAATAAGGACAGGAACC   | CTACCTTCCCATTTGATGCTG         | 60                     | 124                     | 108 | 6                    |
| Sw761                    | CTTTGCTCCCCATTAAGCTG     | TCTAGCAAATGCTGAGATGCC         | 60                     | 161                     | 149 | 6                    |
| Sw763                    | GGGTGCATTGTTCTCATATGG    | TGCTTAGCAACACACACCC           | 62                     | 187                     | 171 | 4                    |
| Sw764                    | TAGCAGATTGTTTAGCCTCTGTG  | AAGCATCTTTTCTAAGCACAACA       | 60                     | 128                     | 112 | 7                    |
| Sw766                    | AATCAATTGTCTCCACTTCAGG   | AATTCTGCCTTGTCCAAAGG          | 60                     | 164                     | 142 | 6                    |
| Sw767                    | TGCGTGACTAGAACCCTGTG     | TCACGCAGAACGTTTCAGAC          | 60                     | 137                     | 0   | 5                    |
| Sw769                    | GGATGACCAAAAAGTCTGGG     | TCTGCTATGTGGGAAGAAATGC        | 60                     | 139                     | 106 | 7                    |
| Sw775                    | TTGCCTTTTAATTTCCCTACTTT  | TGATGGAACATGATGGAGGA          | 58                     | 176                     | 170 | 3                    |
| Sw776                    | TAATCCGTTGCACCCAG        | CCATATGCCACAGTTTCGG           | 58                     | 117                     | 88  | 7                    |
| Sw779                    | TACATGTGCAGAAAACAGAGCC   | TGTTGGCTCCACTTCTTCAC          | 62                     | 107                     | 103 | 3                    |
| Sw780                    | TCTACCAGCTAAAATGCTCACTG  | TAGGACCTGGAATATACTCCCTG       | 62                     | 136                     | 116 | 7                    |
| Sw781                    | CAACTACGTCCTTCTTTTGGC    | GATCCTTGGTCTGGAACCTTG         | 62                     | 198                     | 123 | 8                    |
| Sw782                    | TCTTACATATGAGCACAACC     | CGGAACAAGAGGAAGTGTG           | 60                     | 99                      | 89  | 4                    |
| Sw783                    | CATACCTGCACATCTCTTCAGC   | GCAGCTATAGCTCCGATTGG          | 62                     | 186                     | 0   | 4                    |
| Sw787                    | CTGGAGCAGGAGAAAGTAAATTT  | GGACAGTTACAGACAGAAGAAGG       | 60                     | 161                     | 153 | 5                    |
| Sw790                    | CTGTGGGAGTGTAGCATCTTTG   | CATACACCCAGATGTGGC            | 62                     | 172                     | 118 | 7                    |
| Sw792                    | TACTGGGGTGTAGCTTGTGTG    | TTCCCTCCTCTCCTCTTTCC          | 62                     | 156                     | 140 | 4                    |
| Sw803                    | GGTCACAATTGAGGGCACTC     | TCCCAAGCAACAGAAGTGC           | 58                     | 104                     | 96  | 3                    |
| Sw811                    | GCGGGTATAGCTCCGATT       | TCCTAAACCTGCTTATGCAATT        | 58                     | 183                     | 167 | 4                    |
| Sw813                    | AGTTGATTTAAAATGTTGTGCCA  | AATATTTCAAAAAAGGAATGGG        | 58                     | 110                     | 0   | 4                    |
| Sw816                    | TTCCATACGCTGTGCTTCTG     | AGGATTAGGAGGGTCTCAAGG         | 60                     | 177                     | 147 | 7                    |
| Sw818                    | TCTGATACCACAGATATGGCC    | TTTAACTGTGTGAGCCATCCG         | 58                     | 179                     | 126 | 9                    |
| Sw824                    | CTAAACTTTGAATGTCTTCGCTG  | ACCAAAGCTCGTTCAAGA            | 58                     | 179                     | 163 | 6                    |
| Sw830                    | AAGTACCATGGAGGGAAATG     | ACATGGTTCCAAAGACCTGTG         | 62                     | 189                     | 179 | 4                    |
| Sw832                    | ACTATCCTCTTACTCTCCCTGCA  | TAGCCTGGGAATGTCCATATG         | 62                     | 243                     | 227 | 4                    |
| Sw833                    | CTGACTGTTTTGCTGCAGTG     | TCCACTGAGGTCCTCACTCTC         | 60                     | 183                     | 171 | 5                    |
| Sw835                    | TGGCTCAGAGTTTTCACTCTG    | CAGAGGTTTTACCAAGTTTTGGC       | 60                     | 240                     | 218 | 8                    |
| Sw836                    | TCCAGTGACAATGTGAGTTTC    | TTAGTCACTGTTTTGGAGCCTC        | 58                     | 153                     | 135 | 6                    |
| Sw839                    | GGAAACCAGGATAACAGGAGG    | TAACCCACTGTACCACAAGG          | 62                     | 166                     | 144 | 6                    |
| Sw840                    | CCTGGAAAACAACCTAAGTGTCC  | TTCCACATTAGTTCGGGGAC          | 55                     | 137                     | 121 | 5                    |
| Sw853                    | CTTTCTTCTGTCTGGGTGTGG    | GGGAAAAATAGCCTCCACCTC         | 62                     | 101                     | 89  | 5                    |
| Sw855                    | TCTCTTTTTCTCAAAAGCTGCC   | GGGAAACTGCTTTTACTCCAC         | 58                     | 146                     | 128 | 3                    |
| Sw856                    | AGGGGGTGGGTGATTGTG       | AACCTTCCCCATGCTGCTG           | 62                     | 200                     | 160 | 10                   |
| Sw857                    | TGAGAGGTGAGTACAGAAGACC   | GATCCTCTCCAAATCCCAT           | 58                     | 159                     | 145 | 7                    |
| Sw859                    | TTACAGTTTTGGGTGATGCC     | CAGGTGTGGCCCTAAAAGG           | 60                     | 123                     | 85  | 4                    |
| Sw864                    | TTGCACAGATGCTAATCTTCC    | TTAAGACTGTCTTGGGCAATCC        | 60                     | 178                     | 168 | 6                    |
| Sw866                    | AGTGTGGTGTGACTGATTTGG    | CATGCAGGGAAGGAGAGAG           | 60                     | 185                     | 146 | 4                    |
| Sw871                    | ATCCCTGTTTTCCCTCCACCTC   | AATTAAGCCATTCCACTGGGG         | 60                     | 126                     | 102 | 5                    |
| Sw873                    | TCCATCTACACTGACCCAAATG   | ACAGTAGCCAAGATATGGAAGC        | 60                     | 140                     | 134 | 4                    |
| Sw874                    | AAAAGAACCCTAAGTACAGCAGC  | TTTATGAGGGTATCCTGACACC        | 60                     | 219                     | 191 | 8                    |
| Sw878                    | CTGGGAGCACAACAGATAGTG    | CAAGCAATCAATTCCTTAAGGG        | 60                     | 120                     | 101 | 3                    |
| Sw882                    | TGGTCTCCATCATCATGTG      | TTTTCCGGGAAACAGAAC            | 58                     | 135                     | 119 | 4                    |
| Sw886                    | AATTGGTTTTGTCCAGAAATTTGG | GATCATTTCCCATTTGTTGAATT       | 58                     | 174                     | 142 | 8                    |
| Sw902                    | ATCAGTTGAAATGATGGCC      | CTTGCTCAAAGAGTTGTAAGG         | 60                     | 203                     | 195 | 6                    |
| Sw903                    | TTTCTTTGACAGTTGTGCAAGG   | TGAAGTACAGCAGGACCTG           | 58                     | 201                     | 195 | 4                    |
| Sw904                    | CCCTTTTCAGAAAGATGAAAA    | CCTAGTGGCCAACCAAGT            | 60                     | 179                     | 163 | 5                    |
| Sw905                    | ATCCCAACCTTCTTTCAAAAGG   | TCCAGTGGCAGAACAACATG          | 60                     | 151                     | 125 | 6                    |
| Sw906                    | GAGGACAATGTGAGAAAAAGAATG | TTTTTCTGTGATTAGAAGCTTAGG      | 55                     | 184                     | 158 | 7                    |
| Sw911                    | CTCAGTTCTTTGGGACTGAACC   | CATCTGTGGAAAAAAAAGCC          | 60                     | 173                     | 151 | 7                    |
| Sw915                    | TTTCAATGTTCCCTATTACAGCA  | GCTATAGCTCCAAATTCGACCC        | 60                     | 157                     | 139 | 6                    |
| Sw916                    | GGAGGTGGCAATAACAGG       | GTGCCAGGCTGTTTAAAGG           | 60                     | 142                     | 136 | 4                    |
| Sw917                    | AATCTTGGAACTATGGCCC      | CCAACAATTTCAATCAAGTTG         | 58                     | 137                     | 117 | 5                    |
| Sw919                    | TCCAAAGTCAAGATTTATTC     | TCACAGACTAAATGTAAGAGCT        | 58                     | 132                     | 87  | 11                   |
| Sw920                    | CATGGAGCTGAACCTGCAAAA    | ATCAAGCCCAACTAAGAATACA        | 60                     | 150                     | 142 | 4                    |
| Sw925                    | AGCTCCAATTTGACCCAG       | CTCCAAATTTCTTTGCTCAAGG        | 62                     | 148                     | 123 | 8                    |
| Sw926                    | TAGCAGACCAGATTTTTTTGC    | TTGACCCCTAACCTGGGAG           | 65                     | 115                     | 111 | 2                    |
| Sw933                    | ACATATACTTCGACAGCCCC     | AAGAGCTTGGTGAATTGAGAGC        | 60                     | 133                     | 97  | 5                    |
| Sw935                    | GTGGTGGTTTTCCCTCTATAGC   | ATATAAGGGAAAAAATCTGAAAGAGTATG | 58                     | 203                     | 195 | 5                    |
| Sw936                    | TCTGGAGCTAGCATAAAGTCC    | GTGCAAGTACACATGCAGGG          | 58                     | 112                     | 94  | 6                    |
| Sw937                    | GTGGAGAACCAAAATGGC       | TGGAACCTTTGAACCTGACACC        | 58                     | 226                     | 214 | 6                    |
| Sw938                    | TTATATTTCCATTGCCATTGG    | CACCTATGATGGAACATGATGG        | 58                     | 157                     | 0   | 5                    |
| Sw940                    | TACCTGTGTATGCAGCACG      | TGAGCATCTCATTTCCGTCTC         | 58                     | 157                     | 0   | 5                    |
| Sw940                    | GGCTCCAGTGTACCAAGTCC     | TGTTTTCCAGCTCTATCCG           | 60                     | 144                     | 136 | 4                    |
| Sw943                    | AGGAGGACTAGAGCGCTG       | AGAGAGCCCAAGATAAGAACCC        | 62                     | 132                     | 118 | 2                    |
| Sw944                    | CTCCAGTTCAATTTGAGTTCC    | TCTTCATGTATCACACCCTGC         | 58                     | 166                     | 164 | 2                    |
| Sw949                    | TGAGCAATGAGTTCAATGCC     | TCGTTGGTGAAGGCATCC            | 58                     | 204                     | 178 | 8                    |
| Sw950                    | CTCCATGTGCTGCAGGTG       | CCAAACACTCCCTGCAC             | 62                     | 163                     | 145 | 8                    |
| Sw951                    | TTTCACAACCTCTGGCAGCAG    | GATCGTGCACAAATGGAC            | 58                     | 136                     | 124 | 5                    |
| Sw952                    | AACGGGCACTGCTGTATAG      | GATCATTTCTGCTGCACAGC          | 59                     | 149                     | 143 | 4                    |
| Sw955                    | CTGCTCAAAGTTTATCTTTCCC   | GTCACCTCACTGTCTTTCCC          | 65                     | 113                     | 103 | 5                    |
| Sw957                    | AGGAAGTGAGCTCGAAAGTGC    | ATGGACAAGCTTGGTTTTCC          | 58                     | 157                     | 113 | 9                    |
| Sw960                    | TCTATGAGCCATGCTATGAAGC   | AGTGGGGCCAAACATTAATTC         | 58                     | 182                     | 152 | 4                    |
| Sw962                    | TGAATCTCAAGCAGTAGAGCAC   | TCAAGATGCCACTCACCTC           | 60                     | 160                     | 130 | 5                    |
| Sw964                    | GTGGTTCCCTCTATGCAGAGTCC  | ATGTGATGAAACATGATGGAGG        | 58                     | 248                     | 220 | 5                    |
| Sw967                    | AGCAGACTGTTTACTCTGTTCAG  | GGGGCAGCTGAAAAGTCC            | 58                     | 114                     | 95  | 7                    |
| Sw969                    | AGCCTGGAACATTTTTGAGTG    | TTTTCAATTTGGTTCTGTGTCC        | 60                     | 140                     | 120 | 6                    |
| Sw970                    | AGTGGGCAACCAATAATGC      | GTCTGCCACAAGCTGACTGA          | 58                     | 375                     | 227 | 6                    |

TABLE 1

Continued

| Marker name <sup>a</sup> | Forward primer              | Reverse primer             | PCR <sup>b</sup> temp. | Frag. Size <sup>c</sup> |     | Alleles <sup>d</sup> |
|--------------------------|-----------------------------|----------------------------|------------------------|-------------------------|-----|----------------------|
|                          |                             |                            |                        | Max                     | Min |                      |
| Sw973                    | CACAGTTTGCATTGTGGGTC        | TAGGGGGCCCCGTAAGTTC        | 58                     | 183                     | 171 | 3                    |
| Sw974                    | GGTGAAGTTTTTGCCTTGAACC      | GAAAGAAAATCCAAATCCAAACC    | 58                     | 166                     | 126 | 9                    |
| Sw977                    | GATCAAGGTGAGTCTGACATTA      | CGTCACAAGTGACGCCCTTTA      | 58                     | 104                     | 96  | 4                    |
| Sw978                    | CCCGGTGATGTCAAGTGAC         | CATATGCCGCAAGTGCAG         | 62                     | 150                     | 122 | 5                    |
| Sw980                    | CTTCAGTGTAGTCCAAGTGGC       | GATGTTTTGCTGATAGGAAGGG     | 55                     | 132                     | 0   | 9                    |
| Sw983                    | GCACTCCACTCTTAGGTATATATCC   | ATAATGCTGCTATGAACACTGTAGTG | 60                     | 121                     | 95  | 5                    |
| Sw986                    | AGGAAGCAAAATCTTAAGAGGC      | GGTAGCCAGGAACAAGTATG       | 58                     | 164                     | 150 | 5                    |
| Sw987                    | TTGTTATGCCACTGTGTTGG        | CTCCATATGCCACAGGTGTG       | 58                     | 115                     | 93  | 6                    |
| Sw989                    | CTCATTAAATTTAATTGAGTGAGTGTG | CCCGTGGTTCTGACTGAACT       | 55                     | 135                     | 105 | 7                    |
| Sw995                    | TTAAGCACTTCATGGAGCTTTG      | CATAATGGAAAATACCCGGTCC     | 58                     | 164                     | 150 | 6                    |
| Sw100                    | CAAGGAGTATCTTCTCACAGCA      | CTGGAACTTCCATAAGCCA        | 58                     | 125                     | 0   | 4                    |
| Sw1004                   | TGGGAACACCTGGTTTCATTC       | TCCATATGCCCAAGTGTG         | 60                     | 167                     | 147 | 5                    |
| Sw1008                   | ACAGCCACCAACAGTGGTTG        | GAACTTCCATATGCTGCAAGTG     | 62                     | 255                     | 203 | 9                    |
| Sw1021                   | CGCCACAAGTGAACCTCC          | CCGGGGTCCAGCTATAG          | 60                     | 115                     | 93  | 4                    |
| Sw1026                   | TGGAGAGCAATGCTGTATG         | GTATTTCACTGACGCTCC         | 60                     | 118                     | 97  | 6                    |
| Sw1027                   | AGCAACCTGAGCCACAGTG         | GGAACCTCCACACGCCAC         | 60                     | 159                     | 133 | 9                    |
| Sw1030                   | AACTGGGGAAAGTAGAAGAGCG      | TCATCTCATGCCGTGTCTAAA      | 58                     | 145                     | 137 | 3                    |
| Sw1031                   | ATCACCCAGACAAAACAATCTC      | TATGTCAACCCCAACCC          | 58                     | 117                     | 93  | 4                    |
| Sw1032                   | ATTGGGTGGACTGATATGGT        | GATCTATAAAGTGTAAATGTGTGTG  | 58                     | 171                     | 153 | 3                    |
| Sw1038                   | CAGTCTCTGAACAGTCTTTTCA      | GCTGTTGGTGAGAGTCAATCC      | 58                     | 159                     | 137 | 4                    |
| Sw1041                   | ATCAGAAAATGGTCAACAGTTCA     | GGAGAATTTCCCAAGTTAATAGG    | 58                     | 103                     | 95  | 5                    |
| Sw1042                   | TCAAATCAGTCTTTGCGGTG        | GCCTGGGAACCTCTATACC        | 60                     | 107                     | 93  | 6                    |
| Sw1045                   | GGTTTTATCTTTTTCCAAAAGG      | GTGAGCCAGCCCTCAAAG         | 55                     | 148                     | 144 | 3                    |
| Sw1053                   | CCCACCCACTGACTCCTG          | TGTCGGGGAGTAGACTCAGG       | 60                     | 116                     | 114 | 2                    |
| Sw1055                   | CTCTTCGCTGTGCTAACCC         | CACCTGTCCCAGGCTTGG         | 60                     | 97                      | 91  | 4                    |
| Sw1057                   | TCCCTGTGTACAGATTGATG        | TCCAATTTCCAAAGTTCCTACTAGC  | 58                     | 188                     | 150 | 7                    |
| Sw1059                   | TCTCATGGCCAATCTTTTAC        | CCTGCAACCTTCAAGTTCAGC      | 60                     | 215                     | 133 | 11                   |
| Sw1065                   | TGTAGTGTATGTCAGCACAGG       | TCAGGATGACCTAACCC          | 60                     | 124                     | 120 | 3                    |
| Sw1066                   | GCAGGATGAACCCCTG            | CTCTTGAGGCACCTGCTG         | 62                     | 199                     | 161 | 8                    |
| Sw1067                   | TGCTGGCCAGTACTCTG           | CCGGGGGATTAACAAAAG         | 60                     | 175                     | 144 | 7                    |
| Sw1070                   | CTTGCAGCACTACTTAGGC         | TCTATGTGCTTGGAGTGAGG       | 60                     | 206                     | 168 | 8                    |
| Sw1071                   | AGTGTCTGATATCAAGCACAAGC     | TCACTTCCCACCCCTTACAC       | 62                     | 152                     | 126 | 6                    |
| Sw1073                   | GGGTGCAGCCCTAGAAAAG         | TCAGTACAGATTTGTTTCCCC      | 62                     | 166                     | 150 | 5                    |
| Sw1080                   | GGGAAATTTGGATTTGAAATTG      | CCCTGTCACTGTAACTTGCC       | 60                     | 189                     | 187 | 2                    |
| Sw1081                   | AACTGTAGAACCAGCTGGAGC       | GACCTGTAGCATTAGGACTGG      | 65                     | 152                     | 126 | 6                    |
| Sw1082                   | ATTTGTGAGATAGGTTGGTGT       | CTACCCACTCTCTCTTCC         | 65                     | 107                     | 89  | 5                    |
| Sw1083                   | CCTTGTGGCCCTCCTAAC          | CATACTCCAAAATTTCTATGTTGA   | 60                     | 147                     | 117 | 5                    |
| Sw1085                   | CAGGCTCCCTGACTTCAGAC        | TAGGTCCATCCATGTTTCTGC      | 60                     | 135                     | 117 | 3                    |
| Sw1089                   | TTTTCCCTTCACTCACCC          | GATCAAAGTCCCTTACTCCGG      | 58                     | 182                     | 142 | 7                    |
| Sw1092                   | CCTGCTATGTCTTATTGGGAGG      | GATCCTGCATTGCCAAGG         | 58                     | 314                     | 224 | 8                    |
| Sw1094                   | GATCATGGTGTACCACCTTTATA     | ATTTCTGATGTTGGTACATGGTG    | 58                     | 150                     | 142 | 4                    |
| Sw1101                   | AACCTCCATATGCCACAGGTG       | GGCTCCTCCTCAGAAAAGTCCC     | 62                     | 170                     | 122 | 9                    |
| Sw1105                   | TTCAATTCAAAGAAGTGTTTGTG     | GGTGCATGATGCTCACACC        | 60                     | 139                     | 105 | 8                    |
| Sw1108                   | GTCTTCTTACACGGAAATGC        | CCCCACCTCACACATACATG       | 60                     | 143                     | 131 | 4                    |
| Sw1110                   | GATCTGATGGATTCTAATTTGTGTG   | AGATCGGCTCCAATCTG          | 60                     | 194                     | 0   | 7                    |
| Sw1111                   | AGGTCTACTGTCCATCACAGG       | GAAGCAGAGTTGGCTTACAGTG     | 65                     | 181                     | 165 | 6                    |
| Sw1112                   | CTGGGTTTTGTTTTCTGTTTTG      | TGGCTTGGGAATCTCCATAC       | 60                     | 107                     | 101 | 4                    |
| Sw1113                   | ATGGAACCTGGGTTGGCTTC        | TGCAGCTCTGATTGGCTC         | 60                     | 166                     | 150 | 4                    |
| Sw1117                   | AGGGCCATAAATGGAAATCC        | AAAAACAATAAGACCCCTGTG      | 58                     | 178                     | 157 | 5                    |
| Sw1118                   | ATCACCTTCACTGCAAAATCC       | CTGTGCTATGCAATGCAC         | 62                     | 188                     | 170 | 5                    |
| Sw1119                   | CAACCTCAAAAATGGAGAAAGG      | GTCTTGGGCTGTTTGGC          | 60                     | 160                     | 144 | 7                    |
| Sw1120                   | CAAAATGGAACCCATTACAGTCC     | ACTCCTAGCCCCAGGAGCTTC      | 62                     | 173                     | 144 | 6                    |
| Sw1122                   | TCCCATTTTACAAGAAAAGGTG      | ACTGACATCCTCCAGCCTA        | 62                     | 135                     | 119 | 5                    |
| Sw1123                   | GAGTCTGCCTGCATTGTGAA        | TCTGTCTTTGTTTTCTGTCTT      | 57                     | 178                     | 152 | 6                    |
| Sw1125                   | TAGATGTATATACTTCCATGTGTG    | ATGTTGAGCTTTAATTTTATACA    | 60                     | 141                     | 117 | 10                   |
| Sw1129                   | GATCATATGAGGAAAAGAATGTGT    | CACAGGGGAACACCTTAAT        | 58                     | 155                     | 127 | 6                    |
| Sw1134                   | TAAGTTTAGGTGCCTCATTTGATTT   | GAAAACCTCTTAGTTCTTTATGCAA  | 58                     | 146                     | 134 | 5                    |
| Sw1135                   | TAAGTTTAGGTGCCTCATTTGATTT   | GAAAACCTCTTAGTTCTTTATGCAA  | 60                     | 192                     | 180 | 7                    |
| Sw1200                   | AATGCAAGTATATAAGAGCTTTTTG   | GGTGGTTTTGGCTCCAATTG       | 60                     | 158                     | 130 | 8                    |
| Sw1201                   | CCAACCAACCAACAGAAAAC        | CGGCAGCTGGTAACCCAATT       | 58                     | 212                     | 200 | 4                    |
| Sw1202                   | TAGAGATGGTTGAGGAAAAGGC      | ATGATCCCGGCTCCCTTTTC       | 58                     | 132                     | 124 | 3                    |
| Sw1204                   | ATTTTGAACATGAGTAATCCGTG     | TGATGCTCTTTTCTGTATGTG      | 58                     | 114                     | 0   | 4                    |
| Sw1210                   | GGATGGAACTCCCAAGATA         | AAGAAAATCTCAAGCCAAGGA      | 60                     | 142                     | 130 | 3                    |
| Sw1211                   | TAGACCCTCCTGTGTTCTTTCC      | CATATGCTGTGGAAATGCC        | 62                     | 85                      | 81  | 4                    |
| Sw1218                   | TGTGACTATGGCATAGGCTCC       | GCCTATTAGAAAATGTTCTCTGG    | 58                     | 199                     | 174 | 8                    |
| Sw1262                   | TTGGGGCTCACAAGTAC           | TTGGTAATTTCCGATGCTGC       | 60                     | 147                     | 127 | 3                    |
| Sw1263                   | AGATGAAACTGACATCTTCTGCC     | GATCAAGGAAATAACACTGCTGT    | 55                     | 165                     | 151 | 5                    |

<sup>a</sup> Markers SOXXX were produced at European laboratories with numbers S0001–S0073 contributed by FREDHOLM *et al.* (1993), numbers S0081–S0100 were contributed by L. ANDERSSON and colleagues (ELLERGRÉN *et al.* 1993; JOHNSON, ELLEGREN and ANDERSSON 1992). CH13 is from DAVIES *et al.* (1992b). Primers for markers from structural genes were developed in our laboratory from GenBank sequences. Marker names beginning with Sw and Swr were developed in our laboratory.

<sup>b</sup> The PCR profiles are described in the text. The values refer to the annealing temperature and the superscripts refer to the [MgCl<sub>2</sub>] (millimolar) when it was not 1.5 mM.

<sup>c</sup> Allele sizes were determined in relation to a sequencing ladder of M13mp18 and should be considered approximate. The number 0 refers to alleles that would not amplify in some animals.

<sup>d</sup> The number of alleles (including null alleles) that were observed in this study.

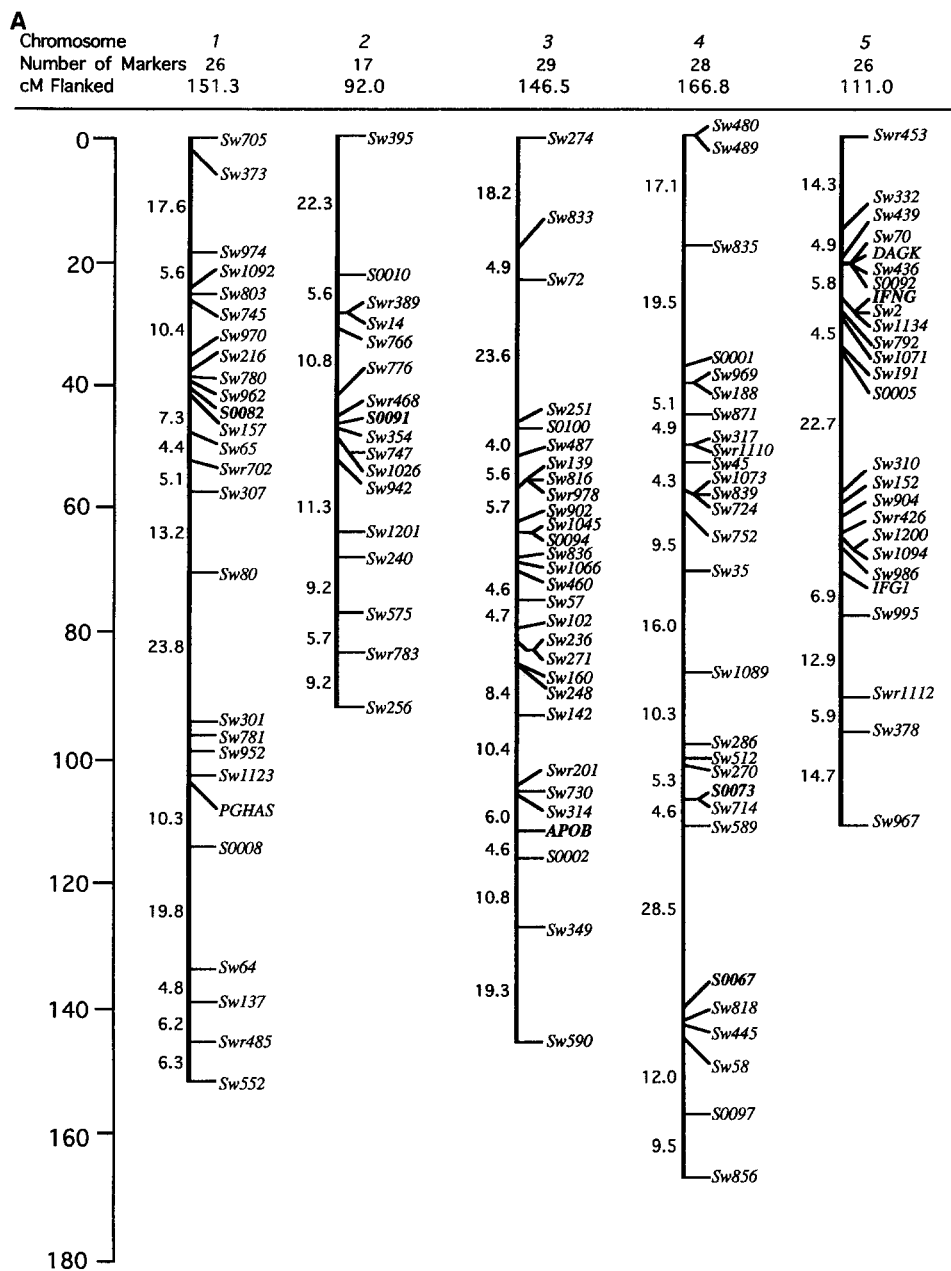

FIGURE 2.—Porcine genetic linkage map. Individual chromosomes are represented by vertical lines. The chromosome number, where known, or linkage group is indicated above together with the number of markers and length in sex-averaged Kosambi centimorgans. The interval between markers is shown on the left side when 4 cM or greater. One pair of linked markers (*Swr68/Sw983*) are not shown as no recombinants were observed. \*The 56.5-cM interval on the X chromosome was not significant.

striction enzymes (*ApaI*, *HaeII* and *MspI*) (KIRKPATRICK 1992a; LARSEN and NIELSEN 1993). *Apolipoprotein B (APOB)* was amplified using primers 3 and 7 (in KAISER *et al.* 1993) and digested with *HincII*. Another fragment was amplified with primers 2 and 6 (in KAISER *et al.* 1993), digested with *HindIII* and found to be monomorphic.

Genotypic data were independently scored and entered into the database by two individuals. Software was developed (D. BEHRENS, J. WRAY and G. A. ROHRER, unpublished data) to compare scores, verify data in concordance and report discrepancies. Discrepancies were either resolved by the scoring individuals or data eliminated from the analyses. All linkage computations were performed using CRIMAP 2.4 (GREEN, FALLS and CROOKS 1990) linkage analysis software on a DEC 5000/25 work station and based on sex-averaged recombination rates (except for markers exhibiting *X*-linked inheritance). The two sire and eight dam pedigree structure (Figure 1) prompted the selection of CRIMAP 2.4 over available software packages for linkage anal-

yses. After preliminary alignment, the CHROMPIC option in CRIMAP along with software developed on site were used to identify unlikely double crossovers (those that occur within a 40-cM region) present in the data. Data contributing to these double crossovers were reanalyzed to determine their validity by rerunning the PCR reactions and blindly scoring the results. The number of errors remaining in these data should be negligible based on the error checking system implemented.

## RESULTS

**Genotyping:** A two generation reference population with eight full-sib families and 94 progeny was developed with two WC boars and eight F<sub>1</sub> sows. Two F<sub>1</sub> sows were WC-DU and six F<sub>1</sub> females (one WC-FE, two WC-MI and three WC-ME) were produced by crossing boars from one of three Chinese breeds: FE,



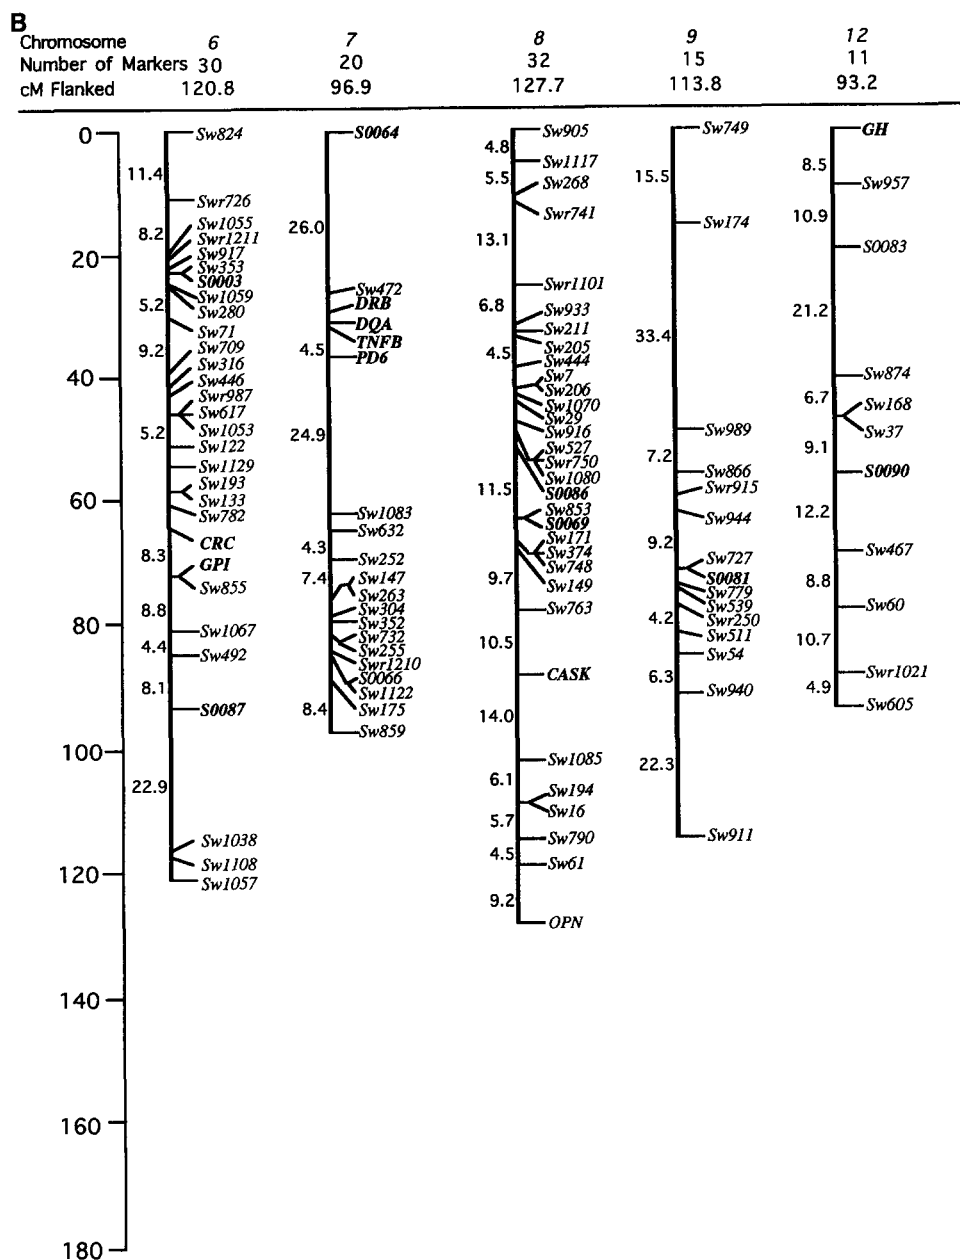

FIGURE 2.—Continued.

ME or MI with WC sows. The two DU-WC sows had litters of 15 and eight piglets; one FE-WC sow had a litter of 12; three ME-WC had litters of 14, 13 and 5; and two MI-WC sows had litters of 14 and 13. One boar sired seven of the eight litters with 81 progeny, while the other boar sired one litter (dam was MI-WC) of 13 piglets (Figure 1). The cross between North American and Chinese pigs was an attempt to design the most genetically and phenotypically diverse intraspecific cross possible in swine. The genetic diversity present in this population will increase type I marker polymorphism and facilitate development of comparative maps.

Our strategy to screen recombinant M13 swine genomic clones for GT:CA dinucleotide MS resulted in 0.24% of all recombinant M13 clones yielding

primer sequences. Eighty-five percent of all primer pairs amplified locus specific products. Only 3% (11/349) of MS developed from our M13 libraries were monomorphic in our families. Forty-nine of the 338 MS markers (14%) developed in our laboratory were adjacent to a short repetitive element (SINGER, PARENT and EHRlich 1987) (designated *Swr*; Table 1). These markers were similarly informative.

We were unable to amplify specific products from three loci (*apolipoprotein A1*, *follistatin* and *inhibin  $\beta$  (b)-subunit*) of 14 MS adjacent to, or within, porcine coding sequences obtained by screening the GenBank and EMBL databases. Three loci were monomorphic (*interleukin 1 $\alpha$* , *growth hormone* and *apolipoprotein C3*) leaving eight (73%) informative loci for analyses: *calcium activated ATPase (ATP2)*, *diacylglycerol kinase*

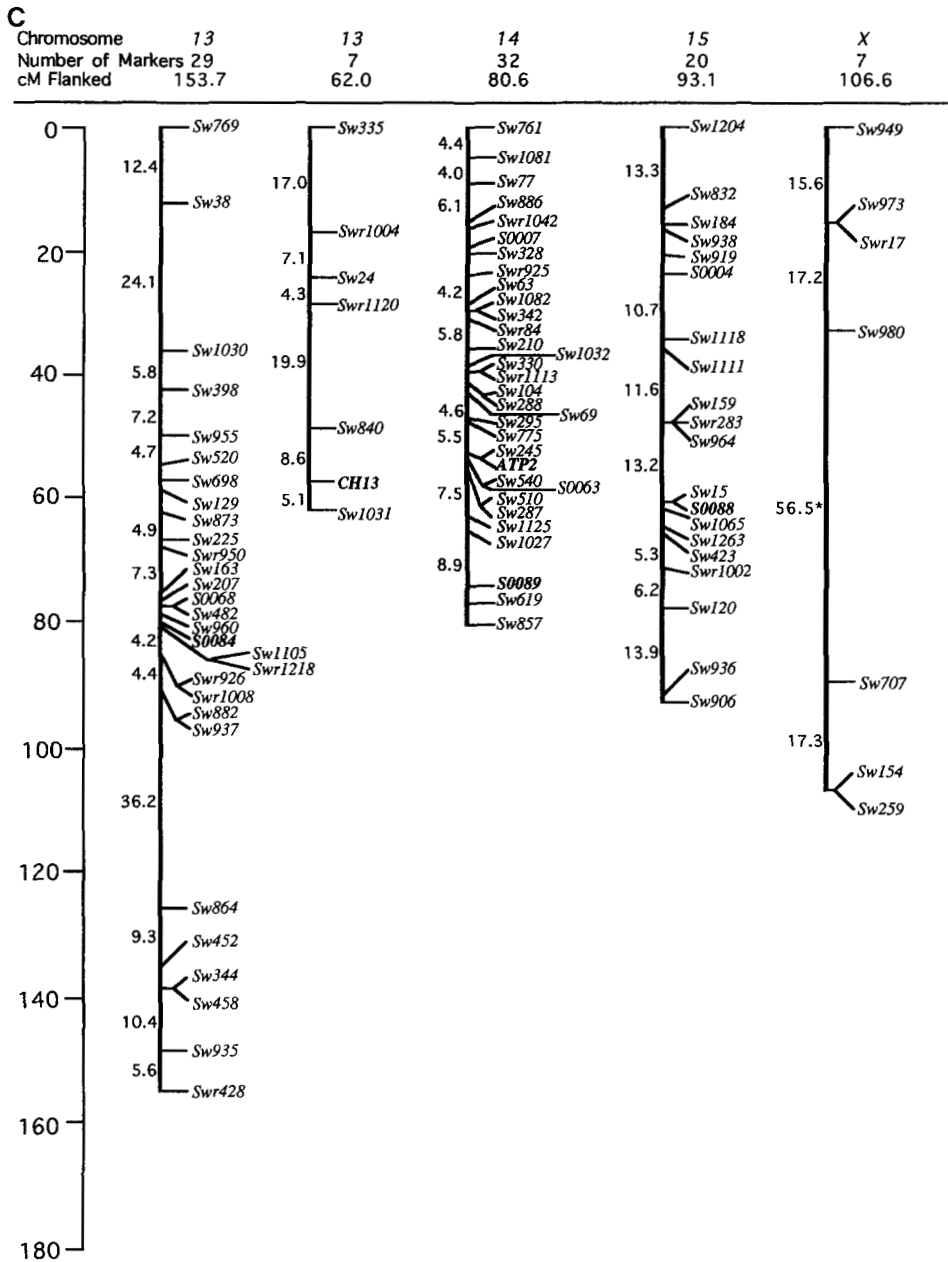

FIGURE 2.—Continued.

(DAGK), *insulin-like growth factor I (IGF1)* (KIRKPATRICK 1992b), *interferon  $\gamma$  (IFNG)*, *osteopontin (OPN)*, *pituitary glycoprotein hormone  $\alpha$ -subunit (PGHAS)*, *ryanodine receptor 1 (CRC)* (BOLT, VOGELI and FRIES 1993) and *tumor necrosis factor  $\beta$  (TNFB)* (Table 1). As MS were more polymorphic than RFLPs, we preferred to use MS associated with genes as MS cost less to genotype and required less labor. While only 36 of 44 published MS (DAVIES *et al.* 1992b; JOHANSSON, ELLEGREN and ANDERSSON 1992; ELLEGREN *et al.* 1993; FREDHOLM *et al.* 1993) were scorable in our families, all 36 were informative. Locus name, primer sequences, PCR conditions and number and range of alleles for MS genotyped are presented in Table 1. The average number of alleles observed across all MS was 5.8.

As expected MS were more polymorphic in WC-Chinese sows. The mean level of heterozygosity was 54.4% for WC boars, 65.9% for WC-DU sows and 81.4% for WC-Chinese sows with WC-ME the most heterozygous breedtype (83.9%). Heterozygosity levels of 46–58% within breeds (ELLEGREN *et al.* 1993; FREDHOLM *et al.* 1993) and ~75% in F<sub>1</sub> animals from diverse crosses (COPPIETERS *et al.* 1993; ELLEGREN *et al.* 1993) of swine have been reported. The level of heterozygosity observed in North American breed composite crosses (WC and WC-DU) was similar to what has been observed in *Bos indicus*  $\times$  *B. taurus* crosses (60–65%) (S. KAPPES and M. BISHOP, unpublished data); humans (63%) (HUDSON *et al.* 1992); and in intraspecific crosses between inbred strains of mice (50%) (DIETRICH *et al.* 1992). The inclusion of WC-

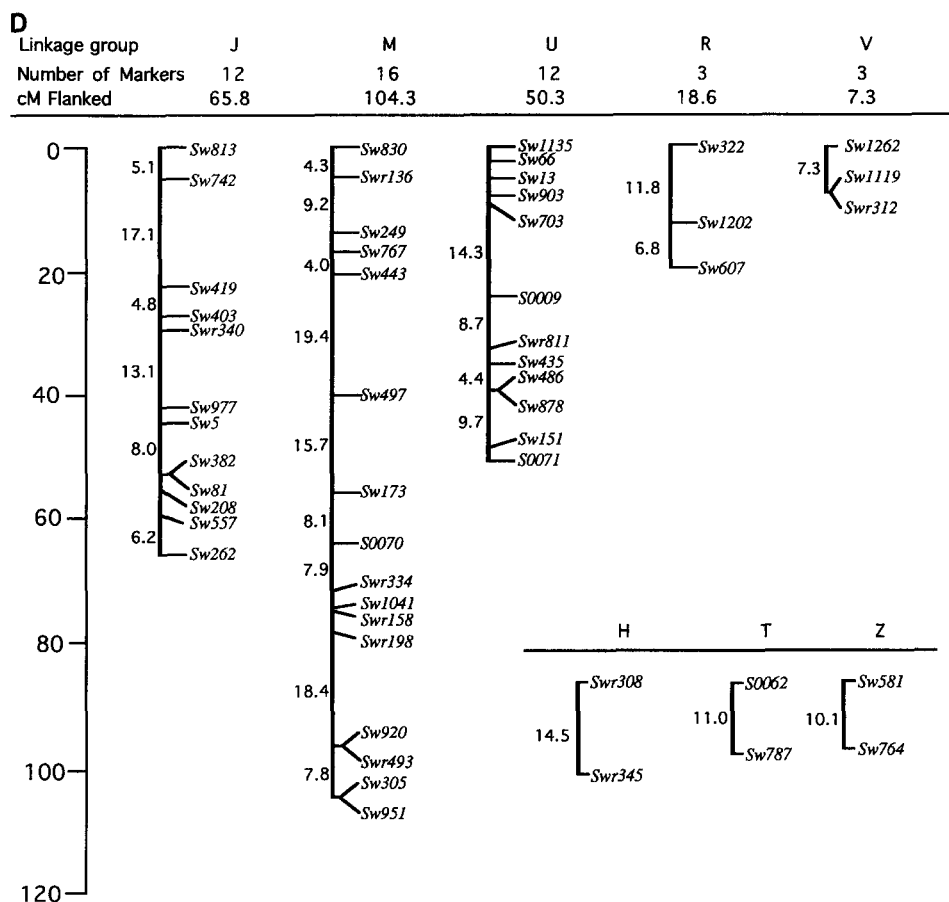

FIGURE 2.—Continued.

Chinese sows accelerated the development of the map as they were nearly as informative as interspecific hybrid mice (90%) (DIETRICH *et al.* 1992).

Only seven RFLPs with previously reported, readily scorable polymorphisms and chromosomally assigned were mapped. All RFLPs developed in our laboratory (analysis of the SLA cluster will be reported elsewhere) for class I (*PD6*) (EHRlich *et al.* 1987) and class II *DQA* (HIRSCH *et al.* 1990) and *DRB* (PRATT *et al.* 1990) major histocompatibility loci were informative. Only one band per allele was observed for class I *PD6* (EHRlich *et al.* 1987) and class II *DQA* (HIRSCH *et al.* 1990) and no more than two bands per allele were found for class II *DRB* (PRATT *et al.* 1990). Restricting probes to regions of genes with low levels of interlocus homology eliminated multilocus hybridization and ensured the observed genetic variability was confined to a single locus. Two alleles of *CASK* (LEVINE *et al.* 1992) also segregated in the population. Glucose phosphate isomerase (*GPI*) was the most informative RFLP (nine alleles present) as the probe sequence is adjacent to an intronic variable number tandem repeat (VNTR) (DAVIES *et al.* 1992a).

Two additional RFLPs were characterized in restriction endonuclease-digested PCR-amplified products. Three restriction enzymes were used for *GH* to maximize the number of informative meioses for this

locus (KIRKPATRICK 1992a; LARSEN and NIELSEN 1993). When analyzed as a single locus for the linkage study, no recombinants were detected within the haplotype. Two alleles for *APOB* were detected in our reference population with *HincII* (KAISER *et al.* 1993).

**Linkage analyses:** Markers were placed into putative linkage groups based on two-point linkage estimates ( $LOD > 3.0$ ). Each set of markers was then aligned based on the linear order that maximized the log likelihood ( $LOD$ ) from multiple-point linkage analyses. All intervals greater than 20 cM were tested for significance by comparing the  $LOD$  of the initial analysis ( $LOD_M$ ) with the  $LOD$  holding the recombination rate of the large interval to 0.5 ( $LOD_{0.5}$ ). Linkage groups were separated by multipoint analysis using CRIMAP 2.4 if the difference ( $LOD_M - LOD_{0.5}$ ) was less than 3.0, thus eliminating spurious two-point linkages. The average number of coinformative meioses observed between all pairs of markers was 73 (range 0–188). As only 60 coinformative meioses are required to detect linkage between markers 20 cM apart with a power of 90% (J. KEELE, unpublished data), most intervals between markers flanking 20 cM or less should be detected. The overall power of detecting linkage was reduced because only two generations of animals were available and without grandparental data the phase of linked markers had to be computed.

Linkage analyses identified 23 autosomal and one X chromosomal linkage groups. Idiograms of each linkage group are presented in Figure 2 and distances between markers are proportional to the sex-averaged rate of recombination. One pair of linked markers (*Swr68/Sw983*) is not presented in Figure 2 as no recombinants were observed. Markers are aligned in the order that maximized the LOD. However, marker order within 5-cM intervals should be considered tentative until additional linkage has been established. Linkage group orientation with respect to the centromere and telomere was arbitrary as polymorphic markers physically assigned to chromosomes are currently minimal in the porcine map. The 383 linked markers covered 1997 cM. The average distance between adjacent markers ( $n = 362$  intervals) was 5.5 cM. Sixty-three percent of all intervals were less than or equal to 5.0 cM while only 3.6% of the intervals were greater than 20.0 cM. Individual linkage groups had between two and 32 markers (mean 16) and spanned from 0 to 167 cM (mean 79.5 cM). An additional seven MS were unlinked in the final analyses (*Sw11*, *Swr67*, *Sw413*, *Sw491*, *Sw943*, *S0061* and *S0099*).

Twenty-seven previously assigned polymorphic loci (20 MS and seven RFLP; Table 2) were incorporated into linkage groups anchored to 13 autosomal chromosomes (Figure 2). Five anchor loci are located on chromosome 7 and four on chromosome 6 with the remaining 11 chromosomes having between one and three anchors each. *Kappa-casein* was assigned to chromosome 8 based on the close linkage of the four casein genes ( $\alpha_{s1}$ -casein,  $\alpha_{s2}$ -casein,  $\beta$ -casein and  $\kappa$ -casein) in cattle (FERRETTI, LEONE and SGARAMELLA 1990; THREADGILL and WOMACK 1990) and sheep (LEVEZIEL *et al.* 1991) and the physical assignment of  $\alpha_{s1}$ ,  $\alpha_{s2}$ - and  $\beta$ -casein to porcine chromosome 8 (ARCHIBALD *et al.* 1992). Fourteen linkage groups contained anchor loci. We assigned linkage groups to chromosomes when at least one member of the group had been directly or indirectly assigned to a chromosome (Table 2). Two linkage groups were assigned to chromosome 13. All five anchor loci for chromosome 7 were members of the same linkage group and all four anchors on chromosome 6 were within one linkage group. The same was true for anchors assigned to chromosome 4, 8 and 12. No linkage group could be established for chromosomes 10, 11, 16, 17 and 18. Informative markers for chromosomes 10, 11 and 16 have recently been developed but have yet to be published (B. CHOWDHARY, personal communication). Chromosomes 17 and 18 remain bereft of markers (ANDERSSON *et al.* 1993). Four randomly generated markers (*Sw154*, *Sw259*, *Sw707* and *Sw980*) exhibited X-linked inheritance in every animal in our reference population and were assumed to be located on the X

chromosome. One of these X-linked markers (*Sw980*) was not significantly linked to the other three (Figure 2). However, *Sw980* was linked to three other markers exhibiting autosomal inheritance. Presumably, *Swr17*, *Sw949* and *Sw973* are located on the pseudoautosomal region of the X and Y chromosomes. We were unable to assign nine linkage groups containing 54 MS markers to chromosomes. As additional markers for chromosomes 10, 11, 16-18 are developed and reported, it is likely that the larger unassigned linkage groups (J, M and U) will be placed on some of these chromosomes.

Our results provide the first assignment of four structural genes and 13 published MS (JOHANSSON, ELLEGREN and ANDERSSON 1992; ELLEGREN *et al.* 1993; FREDHOLM *et al.* 1993) to autosomal chromosomes in the porcine genome. *Diacylglycerol kinase* (*DAGK*) and *IGF1* are assigned to chromosome 5, *PGHAS* is assigned to chromosome 1 and *OPN* to chromosome 8. Marker *S0008* is assigned to chromosome 1, *S0010* to chromosome 2, markers *S0002*, *S0094* and *S0100* to chromosome 3, *S0001* and *S0097* to chromosome 4, *S0005* and *S0092* to chromosome 5, *S0066* to chromosome 7, *S0007* and *S0063* to chromosome 14, and *S0004* to chromosome 15. We were also able to assign four previously published linkage groups to chromosomes. The linkage group of *S0007* and *S0072* (FREDHOLM *et al.* 1993) (also reported as U6: ANDERSSON *et al.* 1993) is assigned to chromosome 14. Linkage groups X, XI and XII (U9) (ANDERSSON *et al.* 1993) established in ELLEGREN *et al.* (1993) are assigned to chromosomes 4, 5 and 3, respectively.

**Coverage of the genome:** While the exact size of the porcine genome remains unknown, the presence of only seven unlinked markers in our analyses initially suggests that the 1997 cM reported here covers a majority of the genome. Our results also indicate that there are at least 20 cM between groups that are currently unlinked but located on the same chromosome, *e.g.*, chromosome 13 had two linkage groups detected. There were five more linkage groups than chromosomes identified in this study (24 linkage groups;  $n = 19$ ). As the unlinked MS are located on chromosomes for which we have other markers, the porcine genome is clearly greater than the 1997 cM reported here; however, if microsatellites are randomly distributed then our data suggest the porcine genome is approximately 2300 cM (J. W. KEELE, unpublished data). Based on length of metaphase chromosomes (ANDERSSON *et al.* 1993), our linkage groups for chromosomes 2, 3, 5, 6, 7, 14, 15 and X are not complete. Large gaps are also present in linkage groups, particularly on chromosomes 1, 7, 9 and 13. Marker distribution in the present study was similar to that expected if MS are distributed uni-

TABLE 2  
References and chromosomal assignments for anchor loci

| Locus name           | Type of marker | Chromosome | Type of assignment <sup>a</sup> | Reference                      |
|----------------------|----------------|------------|---------------------------------|--------------------------------|
| <i>S0082</i>         | MS             | 1          | LG                              | ELLEGREN <i>et al.</i> (1993)  |
| <i>S0091</i>         | MS             | 2          | LG                              | ELLEGREN <i>et al.</i> (1993)  |
| <i>APOB</i>          | RFLP           | 3          | IS                              | SARMIENTO and KADAVIL (1993)   |
| <i>S0067, S0073</i>  | MS             | 4          | LG                              | SOLINAS <i>et al.</i> (1992a)  |
| <i>IFNG</i>          | MS             | 5          | IS                              | FREDHOLM <i>et al.</i> (1993)  |
| <i>S0003, S0087</i>  | MS             | 6          | LG                              | JOHANSSON <i>et al.</i> (1993) |
| <i>RYR</i>           | MS             | 6          | IS                              | FREDHOLM <i>et al.</i> (1992)  |
| <i>GPI</i>           | RFLP           | 6          | IS                              | ELLEGREN <i>et al.</i> (1993)  |
|                      |                |            |                                 | HARBITZ <i>et al.</i> (1990)   |
|                      |                |            |                                 | DAVIES <i>et al.</i> (1988)    |
|                      |                |            |                                 | CHOWDHARY <i>et al.</i> (1989) |
|                      |                |            |                                 | YERLE <i>et al.</i> (1990)     |
| <i>S0064</i>         | MS             | 7          | LG                              | FREDHOLM <i>et al.</i> (1993)  |
| <i>TFNB</i>          | MS             | 7          | IS                              | CHARDON <i>et al.</i> (1991)   |
|                      |                |            |                                 | SOLINAS <i>et al.</i> (1992b)  |
| <i>PD6, DQA, DRB</i> | RFLP           | 7          | IS                              | GEFFROTIN <i>et al.</i> (1984) |
|                      |                |            |                                 | RABIN <i>et al.</i> (1985)     |
|                      |                |            |                                 | ECHARD <i>et al.</i> (1986)    |
| <i>S0069, S0086</i>  | MS             | 8          | LG                              | FREDHOLM <i>et al.</i> (1993)  |
|                      |                |            |                                 | ELLEGREN <i>et al.</i> (1993)  |
| <i>CASK</i>          | RFLP           | 8          | SA                              | See text                       |
| <i>S0081</i>         | MS             | 9          | LG                              | ELLEGREN <i>et al.</i> (1993)  |
| <i>S0083, S0090</i>  | MS             | 12         | LG                              | ELLEGREN <i>et al.</i> (1993)  |
| <i>GH</i>            | RFLP           | 12         | IS                              | THOMSEN <i>et al.</i> (1990)   |
|                      |                |            |                                 | YERLE <i>et al.</i> (1993)     |
| <i>S0084</i>         | MS             | 13         | LG                              | ELLEGREN <i>et al.</i> (1993)  |
| <i>CH13</i>          | MS             | 13         | CS                              | DAVIES <i>et al.</i> (1992b)   |
| <i>S0089, ATP2</i>   | MS             | 14         | LG                              | ELLEGREN <i>et al.</i> (1993)  |
| <i>S0088</i>         | MS             | 15         | LG                              | ELLEGREN <i>et al.</i> (1993)  |

<sup>a</sup> Assignment abbreviations are as follows: LG, linkage analysis; IS, *in situ* hybridization; CS, chromosomal specific library.

formly and selected randomly from the genome (WINTERO, FREDHOLM and THOMSEN 1992; DIETRICH *et al.* 1992). As more informative MS derived from cosmid or lambda genomic clones are placed on the linkage and physical maps, MS distribution as well as genomic coverage can be more accurately assessed.

#### DISCUSSION

We have integrated 334 newly identified MS with 34 MS previously reported, eight MS and seven RFLP associated with type I markers into a skeletal genetic linkage map of the porcine genome. Although comparisons between current linkage results and those previously published are difficult due to the absence of blood typing or serum protein analyses in our study, we were able to compare six intervals in five linkage groups (chromosomes 5, 6, 7, 12 and 14) where identical markers were used (ELLEGREN *et al.* 1993). Six interval distances were comparable including the distance between the *CRC* (*RYR1*) or malignant hyperthermia locus and *S0087* (chromosome 6) (ELLEGREN *et al.* 1993). In five additional linkage groups interval distance between identical markers was significantly greater in the present study when compared with that

reported by FREDHOLM *et al.* (1993) in a smaller pedigree. The accuracy of marker interval and order will be enhanced as similar sets of markers including erythrocyte antigens and serum proteins are screened across several reference populations.

As the porcine physical map develops, new assignments of genes to chromosomal locations will improve the comparative map between the human, mouse and swine genomes. Our strategy to reduce the randomness of saturating the porcine genome with type II markers is to place more type I markers from established syntenic groups (O'BRIEN *et al.* 1993) in our linkage map and assign porcine cosmid clones containing informative MS by *in situ* hybridization through collaborative efforts. As MS are developed that anchor centromeric and telomeric regions, additional randomly generated MS can be rapidly included into the linkage map, expanding genomic coverage and marker density. A combination of approaches by groups mapping the swine genome should rapidly place a significant number of linked markers on the map. Continued searching of databases will provide type II markers, close to or within type I loci. This overall strategy should provide a saturated linkage

map while yielding a sufficient number of dually mapped loci to accurately assess genomic coverage and chromosomal orientation of linkage groups (FREDHOLM *et al.* 1993).

In summary, the number of MS markers linked in the present swine genetic map will allow us and other investigators to initiate a concerted effort to identify markers which can be used in MAS and provide the frame work for identifying gene(s) that contribute to production efficiency.

The authors wish to acknowledge the contribution of D. B. LASTER whose vision and energy made this effort possible. Thanks to J. WRAY, D. BEHRENS, M. BISHOP, S. KAPPES, R. STONE and S. SUNDE for helpful discussions, K. SIMMERMAN, R. GODTEL, C. MAHAFFEY and R. SAMSON for technical assistance, S. KLUVER for manuscript preparation, and the MARC swine crew for outstanding husbandry. Special thanks to M. FREDHOLM and L. ANDERSSON for providing primer pairs prior to publication.

Mention of a trade name, proprietary product or specific equipment does not constitute a guarantee or warranty by the USDA and does not imply approval to the exclusion of other products that may be suitable.

#### LITERATURE CITED

- ANDERSSON, L., A. L. ARCHIBALD, J. GELLIN and L. B. SCHOOK, 1993 1st pig gene mapping workshop (PGM1), August 7, 1992, Interlaken, Switzerland. *Anim. Genet.* **24**: 205–216.
- ANSARI, H. A., P. D. PEARCE and D. W. MAHER, 1993 Regional assignment of anchored reference loci to sheep chromosomes. Proceedings 8th North American Colloquium on Domestic Animal Cytogenetics and Gene Mapping **8**: 59–61.
- ARCHIBALD, A. L., J. F. BROWN, C. S. HALEY, M. FREDHOLM, A. K. WINTERO, *et al.*, 1992 Linkage mapping in the domestic pig (*Sus scrofa*). *Anim. Genet.* **23**: 88.
- BOLT, R., P. VÖGELI and R. FRIES, 1993 A polymorphic microsatellite at the *RYR1* locus in swine. *Anim. Genet.* **24**: 72.
- CHARDON, P., M. NUNES, F. DEZEURE, D. ANDRES-CARA and M. VAIMAN, 1991 Mapping the genetic organization of the *TNF* genes in the swine *MHC*. *Immunogenetics* **34**: 257–260.
- CHOWDHARY, B. P., I. HARBITZ, A. MÄKINEN, W. DAVIES and I. GUSTAVSSON, 1989 Localization of the *glucose phosphate isomerase* gene to the p12-q21 segment of chromosome 6 in pig by *in situ* hybridization. *Hereditas* **111**: 73–78.
- COPPIETERS, W., A. VAN DE WEGHE, L. PEELMAN, A. DEPICKER, A. VAN ZEVEREN and Y. BOUQUET, 1993 Characterization of porcine polymorphic microsatellite loci. *Anim. Genet.* **24**: 163–170.
- DAVIES, W., I. HARBITZ, R. FRIES, G. STRANZINGER and J. HAUGE, 1988 Porcine malignant hyperthermia carrier detection and chromosomal assignment using a linked probe. *Anim. Genet.* **19**: 203–212.
- DAVIES, W., S. KRAN, T. KRISTENSEN and I. HARBITZ, 1992a Characterization of a porcine variable number tandem repeat sequence specific for the *glucose phosphate isomerase* locus. *Anim. Genet.* **23**: 437–442.
- DAVIES, W., B. HOYHEIM, B. CHAPUT, G. FRELAT and A. KEISERUD, 1992b Rapid isolation of porcine chromosome 13 specific microsatellites. *Anim. Genet.* **23**: 90–91.
- DIETRICH, W., H. KATZ, S. E. LINCOLN, H. SHIN, J. FRIEDMAN, *et al.*, 1992 A genetic map of the mouse suitable for typing intraspecific crosses. *Genetics* **131**: 423–447.
- ECHARD, G., M. YERLE, J. GELLIN, M. DALENS and M. GILLOIS, 1986 Assignment of the major histocompatibility complex to the p14-q12 region of chromosome 7 in the pig (*Sus scrofa domestica* L.) by *in situ* hybridization. *Cytogenet. Cell Genet.* **41**: 126–128.
- EHRlich, R., R. LIFSHITZ, M. D. PESCOVITZ, S. RUDIKOFF and D. S. SINGER, 1987 Tissue specific expression and structure of a divergent member of a class I MHC gene family. *J. Immunol.* **139**: 593–602.
- ELLEGREN, H., M. JOHANSSON, B. P. CHOWDHARY, S. MARKLUND, D. RUYTER, *et al.*, 1993 Assignment of 20 microsatellite markers to the porcine linkage map. *Genomics* **16**: 431–439.
- FERRETTI, L., P. LEONE and V. SGARAMELLA, 1990 Long range restriction analysis of the bovine casein genes. *Nucleic Acids Res.* **18**: 6829–6833.
- FOWLER, T., 1992 Pigmeat: situation and outlook. *Pig News and Information* **13**: 87N–89N.
- FREDHOLM, M., A. K. WINTERO, K. CHRISTENSEN, B. KRISTENSEN, P. B. NIELSEN, *et al.*, 1993 Characterization of 24 porcine (dA-dC)<sub>n</sub>-(dT-dG)<sub>n</sub> microsatellites: genotyping of unrelated animals from four breeds and linkage studies. *Mamm. Genome* **4**: 187–192.
- FRIES, R., 1993 Mapping the bovine genome: methodological aspects and strategy. *Anim. Genet.* **24**: 111–116.
- FRIES, R., A. EGGEN and J. E. WOMACK, 1993 The bovine genome map. *Mamm. Genome* **4**: 405–428.
- GEFFROTIN, C., P. POPESCU, E. CRIBIU, J. BOSCHER, C. RENARD, *et al.*, 1984 Assignment of MHC in swine to chromosome 7 by *in situ* hybridization and serological typing. *Ann. Genet.* **27**: 213–219.
- GEORGES, M., R. DRINKWATER, T. KING, A. MISHRA, S. S. MOORE, *et al.*, 1993a Microsatellite mapping of a gene affecting horn development in *Bos Taurus*. *Nat. Genet.* **4**: 206–210.
- GEORGES, M., A. B. DIETZ, A. MISHRA, D. NIELSEN, L. S. SARGEANT, *et al.*, 1993b Microsatellite mapping of the gene causing Weaver disease in cattle will allow the study of an associated quantitative trait locus. *Proc. Natl. Acad. Sci.* **90**: 1058–1062.
- GREEN, P., K. FALLS and S. CROOKS, 1990 *Documentation for CR1-MAP, version 2.4*. Washington University School of Medicine, St. Louis.
- HARBITZ, I., B. P. CHOWDHARY, P. D. THOMSEN, W. DAVIES, U. KAUFMANN, *et al.*, 1990 Assignment of the porcine *calcium release channel* gene, a candidate for the malignant hyperthermia locus to the 6p11-q21 segment of chromosome 6. *Genomics* **8**: 243–248.
- HIRSCH, F., D. H. SACHS, K. GUSTAFSSON, K. PRATT, S. GERMANA, *et al.*, 1990 Class II genes of miniature swine III. Characterization of an expressed pig class II gene homologous to HLA-DQA. *Immunogenetics* **31**: 52–56.
- HODSON, C. J., 1985 The pig as a model for studying kidney disease in man, pp. 1691–1709 in *Swine in Biomedical Research*, edited by M. C. TUMBELSON. Plenum Publishing, New York.
- HUDSON, T. J., M. ENGELSTEIN, M. K. LEE, E. C. HO, M. J. RUBENFIELD, *et al.*, 1992 Isolation and chromosomal assignment of 100 highly informative human simple sequence repeat polymorphisms. *Genomics* **13**: 622–629.
- JOHANSSON, M., H. ELLEGREN and L. ANDERSSON, 1992 Cloning and characterization of highly polymorphic porcine microsatellites. *J. Hered.* **83**: 196–198.
- JOHANSSON, M., B. CHOWDHARY, F. GU, H. ELLEGREN, I. GUSTAVSSON, *et al.*, 1993 Genetic analysis of the gene for porcine submaxillary gland mucin: physical assignment of the *MUC* and *interferon γ* genes to chromosome 5. *J. Hered.* **84**: 259–262.
- KAISER, M. E., D. N. NEVIN, S. L. STURLEY, C. PURTELL and A. D. ATTIE, 1993 Determination of pig *apolipoprotein B* genotype by gene amplification and restriction fragment length polymorphism analysis. *Anim. Genet.* **24**: 117–120.
- KIRKPATRICK, B. W., 1992a *Hae*II and *Msp*I polymorphisms are detected in the second intron of the porcine *growth hormone* gene. *Anim. Genet.* **23**: 180–181.
- KIRKPATRICK, B. W., 1992b Identification of a conserved micro-

- satellite site in the porcine and bovine *insulin-like growth factor-I* gene 5' flank. *Anim. Genet.* **23**: 543–548.
- LARSEN, N. J., and V. H. NIELSEN, 1993 *ApaI* and *CfoI* polymorphisms in the porcine *growth hormone* gene. *Anim. Genet.* **24**: 71.
- LEVEZIEL, H., L. METENIER, G. GUERIN, P. CULLEN, C. PROVOT, *et al.*, 1991 Restriction fragment length polymorphism of ovine casein genes: close linkage between the  $\alpha_{s1}$ ,  $\alpha_{s2}$ ,  $\beta$ - and  $\kappa$ -casein loci. *Anim. Genet.* **22**: 1–10.
- LEVINE, W. B., L. J. ALEXANDER, G. E. HOGANSON and C. W. BEATTIE, 1992 Cloning and sequencing of the porcine  $\kappa$ -casein cDNA. *Anim. Genet.* **23**: 361–363.
- LITT, M., and J. A. LUTY, 1989 A hypervariable microsatellite revealed by *in vitro* amplification of a dinucleotide repeat within the *cardiac muscle actin* gene. *Am. J. Hum. Genet.* **44**: 397–401.
- LUONGO, C., K. A. GOULD, L. SU, K. W. KINZLER, B. VOGELSTEIN, *et al.*, 1993 Mapping of multiple intestinal neoplasia (Min) to proximal chromosome 18 of the mouse. *Genomics* **15**: 3–8.
- MERSMANN, H. J., W. G. POND and J. T. YEN, 1982 Plasma glucose, insulin and lipids during growth of genetically lean and obese swine. *Growth* **46**: 189–198.
- O'BRIEN, S. J., J. E. WOMACK, L. A. LYONS, K. J. MOORE, N. A. JENKINS, *et al.*, 1993 Anchor reference loci for comparative genome mapping in mammals. *Nat. Genet.* **3**: 103–112.
- PRATT, K., D. H. SACHS, S. GERMANA, M. EL-GAMIL, F. HIRSCH, *et al.*, 1990 Class II genes of miniature swine II. Molecular identification and characterization of B( $\beta$ ) genes from the SLA haplotype. *Immunogenetics* **31**: 1–6.
- RABIN, M., R. FRIES, D. SINGER and F. H. RUDDLE, 1985 Assignment of the porcine major histocompatibility complex to chromosome 7 by *in situ* hybridization. *Cytogenet. Cell Genet.* **39**: 206–209.
- SAMBROOK, J., E. F. FRITSCH and T. MANIATIS, 1989 *Molecular Cloning: A Laboratory Manual*, Ed. 2. Cold Spring Harbor Laboratory, Cold Spring Harbor, N.Y.
- SANGER, F., S. NICKLEN and A. R. COULSON, 1977 DNA sequencing with chain-terminating inhibitors. *Proc. Natl. Acad. Sci.* **74**: 5463–5467.
- SARMIENTO, U. M., and K. KADAVIL, 1993 Mapping of the porcine *apolipoprotein B (APOB)* gene to chromosome 3 by fluorescence *in situ* hybridization. *Mamm. Genome* **4**: 66–67.
- SINGER, D. S., L. J. PARENT and R. EHRLICH, 1987 Identification and DNA sequence of an interspersed repetitive DNA element in the genome of miniature swine. *Nucleic Acids Res.* **15**: 2780.
- SOLINAS, S., J. HASLER-RAPACZ, N. MAEDA, J. RAPACZ and R. FRIES, 1992a Assignment of the pig *apolipoprotein B* locus (*APOB*) to chromosome region 3q24-qter. *Anim. Genet.* **23**: 71–75.
- SOLINAS, S., U. PAULI, P. KUHNERT, E. PETERHANS and R. FRIES, 1992b Assignment of the porcine *tumor necrosis factor alpha* and *beta* genes to the chromosome region 7p11-q11 by *in situ* hybridization. *Anim. Genet.* **23**: 267–271.
- THOMSEN, P. D., M. FREDHOLM, K. CHRISTENSEN and M. SCHWERIN, 1990 Assignment of the porcine *growth hormone* gene to chromosome 12. *Cytogenet. Cell Genet.* **54**: 92–94.
- THREADGILL, D. W., and J. E. WOMACK, 1990 Genomic analysis of the major bovine milk protein genes. *Nucleic Acids Res.* **18**: 6935–6942.
- TISSOT, R. G., C. W. BEATTIE and M. S. AMOSS, JR., 1987 Inheritance of Sinclair swine cutaneous malignant melanoma. *Cancer Res.* **47**: 5542–5545.
- WARWICK, E. J., and J. E. LEGATES, 1979 *Improving swine*, p. 467 in *Breeding and Improvement of Farm Animals*, Ed. 7. McGraw-Hill, New York.
- WEBER, J. L., and P. E. MAY, 1989 Abundant class of human DNA polymorphisms which can be typed using the polymerase chain reaction. *Am. J. Hum. Genet.* **44**: 388–396.
- WINTERO, A. K., M. FREDHOLM and P. D. THOMSEN, 1992 Variable (dG-dT)<sub>n</sub>·(dC-dA)<sub>n</sub> sequences in the porcine genome. *Genomics* **12**: 281–288.
- WOMACK, J. E., 1987 Comparative genome mapping: A valuable new tool for mammalian developmental studies. *Dev. Genet.* **8**: 281–293.
- WOMACK, J. E., and Y. D. MOLL, 1986 A gene map of the cow: conservation of linkage with mouse and man. *J. Hered.* **77**: 2–7.
- YERLE, M., J. GELLIN, M. DALENS and O. GALLMAN, 1990 Localization on pig chromosome 6 of markers *GPI*, *APOE* and *ENO1* carried by human chromosomes 1 and 19 using *in situ* hybridization. *Cytogenet. Cell Genet.* **54**: 86–91.
- YERLE, M., Y. LAHBIB-MANSAIS, P. D. THOMSEN and J. GELLIN, 1993 Localization of the porcine *growth hormone* gene to chromosome 12p1·21Ap1·5. *Anim. Genet.* **24**: 129–131.

Communicating editor: N. A. JENKINS
